# Supplementary material for: Focal mechanisms and the stress field in the aftershock area of the 2018 Hokkaido Eastern Iburi earthquake (MJMA = 6.7)
Source: Research Square preprint supplement (doi:10.21203/rs.3.rs-41024/v4), 2020-11-24
Supplement: Supplementary file 1 [file 9108f0427f7b3f43d39b1dfc.csv]

#(1) origin time	year
#(2) origin time	month
#(3) origin time	day
#(4) origin time	hour
#(5) origin time	minute
#(6) origin time	second
#(7) magnitude
#(8) hypocenter latitude (decimal degrees)
#(9) hypocenter longitude (decimal degrees)
#(10) hypocenter depth (km)
#(11) horizontal error (km)
#(12) depth error (km)
#(13) focal mechanism strike (degrees)
#(14) focal mechanism dip (degrees)
#(15) focal mechanism rake (degrees)
#(16) fault plane uncertainty (degrees)
#(17) auxiliary plane uncertainty (degrees)
#(18) number of P first motion polarities
#(19) weighted percent misfit of first motions
#(20) focal mechanism quality: A-F
#(21) probability mechanism close to solution
#(22) 100*(station distribution ratio)
#Hardebeck and Shearer (2002) explaines the terminology in detail.
#
#
2018	9	6	3	17	8.8	5.1	42.62183	141.95151	30.67	0.26	0.2	40	73	137	18	15	42	15	A	98	57
2018	9	6	3	19	49.96	4.5	42.65117	142.01083	38.86	0.29	0.33	148	42	62	19	29	31	16	B	82	60
2018	9	6	3	23	48.84	5	42.8125	141.97333	32.65	0.23	0.18	151	16	63	31	33	27	19	B	70	57
2018	9	6	3	25	35.99	4.5	42.68583	141.99767	34.84	0.26	0.26	178	32	70	20	20	30	9	A	95	58
2018	9	6	3	32	51.94	4.8	42.728	141.98801	33.72	0.25	0.22	215	75	164	24	19	22	0	A	91	60
2018	9	6	3	32	35.95	3.8	42.75317	141.99884	34.63	0.25	0.23	161	49	39	21	22	35	20	C	92	53
2018	9	6	3	45	34.88	3	42.71783	141.97217	31.99	0.25	0.2	143	16	128	36	33	16	22	C	65	69
2018	9	6	3	56	25.45	4.1	42.69433	141.96967	34.24	0.27	0.25	143	23	55	15	13	27	6	A	100	56
2018	9	6	4	3	37.6	3.2	42.72567	141.96266	30.32	0.26	0.2	288	39	159	28	34	23	26	C	67	62
2018	9	6	4	10	47.11	5	42.6715	141.98483	33.07	0.35	0.32	181	56	132	23	22	25	17	B	95	59
2018	9	6	4	37	44.96	3	42.6315	141.98784	35.75	0.36	0.37	216	86	-163	40	36	13	13	D	45	52
2018	9	6	4	39	4.5	4.4	42.636	141.98917	35.82	0.36	0.37	183	53	111	33	32	26	19	B	71	46
2018	9	6	4	42	37.63	4.1	42.63683	141.99834	35.37	0.35	0.35	212	46	96	20	21	29	10	A	97	50
2018	9	6	4	55	7.74	3.1	42.60083	141.94417	31.94	0.35	0.28	7	88	-87	27	23	17	10	A	89	64
2018	9	6	4	57	12.23	3.7	42.59367	141.935	32.91	0.36	0.3	143	31	110	8	13	22	8	A	100	61
2018	9	6	5	13	-4.09	3.9	42.80933	141.96883	32.88	0.31	0.23	241	24	145	26	27	21	13	B	82	54
2018	9	6	6	51	1.9	3.4	42.754	141.96434	32.31	0.35	0.26	187	55	-139	36	35	21	18	C	60	55
2018	9	6	7	19	36.94	3.9	42.73117	141.97633	31.79	0.34	0.27	17	57	90	33	37	18	26	C	56	59
2018	9	6	7	36	2.81	3.8	42.6235	141.9435	30.83	0.38	0.33	22	83	-157	33	32	19	8	B	64	62
2018	9	6	7	45	50.82	4.4	42.801	141.9895	33.65	0.33	0.28	36	73	148	33	29	17	10	B	77	51
2018	9	6	8	15	18.99	3.9	42.63717	141.95967	30.97	0.37	0.31	16	34	169	34	32	16	15	C	54	61
2018	9	6	8	25	16.86	3	42.80117	142.00517	32.55	0.34	0.28	44	75	133	43	38	14	13	D	43	54
2018	9	6	9	19	37.35	3.2	42.616	141.94034	30.78	0.42	0.38	276	75	-107	48	41	11	13	D	40	54
2018	9	6	12	13	24.23	3	42.59483	141.98351	35.92	0.47	0.84	153	78	85	46	49	10	26	D	33	42
2018	9	6	13	34	8.96	3.5	42.59283	141.93617	32.1	0.44	0.52	18	82	-155	39	38	14	5	D	42	46
2018	9	6	14	4	-2.24	4.6	42.59267	141.94299	33.71	0.43	0.53	29	78	126	19	15	21	12	A	98	52
2018	9	6	14	39	45.21	4.5	42.78367	141.98233	35.64	0.37	0.44	356	46	91	25	31	19	7	B	81	44
2018	9	6	15	12	51.28	3.2	42.68267	141.98666	34.99	0.38	0.43	323	32	143	27	22	14	0	A	89	54
2018	9	6	15	22	29.06	2.7	42.66567	141.992	32.72	0.37	0.34	137	50	91	43	49	10	23	D	27	62
2018	9	6	15	23	29.27	3.2	42.76517	142.00349	31.77	0.34	0.3	248	35	145	27	37	16	29	C	65	52
2018	9	6	15	30	14.76	2.8	42.71183	142.00067	33.01	0.36	0.33	131	58	106	49	56	13	28	D	28	62
2018	9	6	15	43	10.09	2.8	42.75717	142.00133	34.48	0.36	0.37	292	44	176	33	35	18	11	C	59	50
2018	9	6	16	19	-1.29	2.7	42.78083	142.00633	33.12	0.34	0.32	292	60	104	49	49	12	36	D	36	57
2018	9	6	16	28	49.92	3.9	42.71733	141.97484	35.95	0.37	0.44	355	89	-155	25	26	20	10	B	83	50
2018	9	6	16	39	38.06	2.5	42.68067	141.97983	32.66	0.36	0.33	175	68	89	42	46	11	22	D	41	66
2018	9	6	16	53	23.96	4.9	42.682	141.96933	34.17	0.42	0.39	186	78	-176	40	38	17	0	D	48	53
2018	9	6	17	27	29.21	2.5	42.703	141.97783	33	0.35	0.33	78	68	144	35	35	13	0	B	62	63
2018	9	6	17	41	28.66	2.1	42.6525	141.99167	35.07	0.39	0.46	200	86	-107	35	30	12	13	B	69	59
2018	9	6	18	34	-5.54	3.6	42.69283	141.97749	34.99	0.37	0.42	156	53	64	32	32	20	16	B	63	51
2018	9	6	18	48	37.46	2.5	42.7245	141.98917	33.76	0.36	0.36	27	83	135	47	40	11	40	D	40	60
2018	9	6	18	57	0.37	3	42.675	141.98317	32.37	0.36	0.32	192	63	125	41	46	10	20	D	37	62
2018	9	6	19	4	-4.72	3	42.64217	141.9845	33.53	0.37	0.35	182	80	150	28	31	17	10	B	74	62
2018	9	6	19	15	26.02	2.9	42.7345	141.96133	30.45	0.33	0.28	248	31	108	36	41	16	15	D	46	59
2018	9	6	19	50	31.48	2.4	42.68033	141.9875	32.96	0.35	0.33	162	66	60	40	41	10	14	D	43	64
2018	9	6	20	2	46.26	2.6	42.789	142	33.65	0.34	0.33	359	69	132	46	35	14	33	D	37	56
2018	9	6	20	9	-1.31	2	42.79117	142.015	32.87	0.34	0.32	288	64	-123	48	54	10	28	D	32	56
2018	9	6	20	40	39.56	2.4	42.61133	141.92967	27.34	0.33	0.31	34	75	-117	49	53	13	29	D	30	59
2018	9	6	20	51	47.82	3.6	42.7185	141.97983	33.23	0.34	0.33	118	7	46	35	33	15	14	B	68	64
2018	9	6	20	54	-3.47	3.6	42.79067	141.9915	35.75	0.34	0.39	205	65	-173	32	28	20	8	B	71	51
2018	9	6	20	58	29.46	2.4	42.64117	141.987	34.53	0.37	0.38	350	41	106	45	48	11	12	D	32	57
2018	9	6	21	1	41.69	3.2	42.73567	141.979	33.01	0.33	0.31	210	38	98	32	37	18	31	D	61	61
2018	9	6	21	5	4.88	2.8	42.80717	142.01233	32.98	0.32	0.3	61	86	144	32	33	15	14	B	66	59
2018	9	6	21	10	21.27	2.4	42.675	141.97983	33.87	0.37	0.35	277	51	157	35	40	11	9	D	38	65
2018	9	6	21	14	19.98	3.4	42.70867	141.98367	32.91	0.33	0.31	179	77	-166	26	24	22	8	A	86	55
2018	9	6	21	36	36.59	4	42.633	141.9745	34.13	0.37	0.37	18	73	-151	33	32	26	11	B	62	52
2018	9	6	21	43	52.33	2.3	42.663	141.98883	35.49	0.37	0.44	222	87	-130	43	34	11	19	C	52	60
2018	9	6	22	32	50.1	2.5	42.79167	142.00833	33.05	0.32	0.3	343	13	-81	44	49	8	18	D	34	67
2018	9	6	22	35	49.76	4.4	42.61883	141.94383	29.9	0.34	0.32	39	57	146	30	27	22	7	B	82	61
2018	9	6	22	56	-0.94	2.4	42.68383	141.99117	33.5	0.34	0.33	7	86	-150	46	48	9	23	D	31	64
2018	9	6	22	59	23.16	2.8	42.73267	141.98517	34.48	0.34	0.35	34	79	-128	38	40	15	15	D	47	61
2018	9	6	23	8	3.28	1.9	42.68683	141.99417	33.95	0.35	0.35	190	31	58	47	47	11	39	D	29	57
2018	9	6	23	43	48.75	4.6	42.7765	142.0025	34.35	0.32	0.34	196	89	-133	29	27	25	32	D	80	56
2018	9	6	23	48	10.88	2.4	42.6835	141.96716	31.54	0.32	0.29	67	69	-117	50	57	10	38	D	31	65
2018	9	7	0	1	6.21	3.1	42.63083	141.96967	34.12	0.35	0.35	179	76	-134	35	34	13	0	B	61	52
2018	9	7	0	3	16.92	3.2	42.7015	141.97017	34.23	0.34	0.35	201	87	-107	43	43	13	19	D	46	66
2018	9	7	0	23	24.24	3.1	42.70617	141.98367	32.23	0.32	0.3	175	56	126	31	31	17	10	B	72	59
2018	9	7	0	36	26.83	3.1	42.71917	141.96733	31.45	0.31	0.3	59	60	139	29	32	16	0	B	74	60
2018	9	7	0	39	44.15	2.9	42.67633	141.981	32.72	0.33	0.32	68	57	157	31	31	20	23	C	72	62
2018	9	7	0	43	42.89	2.8	42.6945	141.96883	32.32	0.32	0.31	40	87	-170	34	30	20	8	B	70	59
2018	9	7	0	56	22.48	2.7	42.81767	141.994	32.23	0.3	0.3	172	84	-163	30	33	17	17	B	66	50
2018	9	7	1	41	33.2	4.4	42.6225	141.961	33.19	0.34	0.32	183	87	159	27	29	29	18	B	77	54
2018	9	7	1	50	31.22	1.9	42.67484	141.97951	35.34	0.34	0.42	278	80	160	36	38	12	12	C	50	64
2018	9	7	2	10	17.93	3.4	42.5945	141.964	34.97	0.37	0.42	230	58	-143	33	22	20	11	B	74	52
2018	9	7	2	15	11.38	3	42.67133	141.98584	35.53	0.33	0.41	316	18	-133	31	34	20	27	C	67	51
2018	9	7	3	1	23.41	2.7	42.67433	141.96634	31.58	0.31	0.27	51	80	169	36	39	16	21	D	46	57
2018	9	7	3	14	31.75	2.4	42.686	141.98866	35.53	0.33	0.4	88	21	-46	31	42	16	16	D	46	55
2018	9	7	3	26	25.66	2.1	42.69933	141.97816	33.27	0.31	0.3	223	84	-148	43	33	11	13	D	44	68
2018	9	7	3	30	51.84	2.1	42.6855	141.9915	36.27	0.34	0.42	215	77	138	45	48	12	32	D	33	67
2018	9	7	3	47	33.07	4.1	42.61783	141.95784	32.13	0.32	0.28	35	68	139	28	20	29	7	A	85	53
2018	9	7	3	54	7.46	3	42.62634	141.97099	32.57	0.33	0.29	35	47	132	23	28	19	16	B	86	53
2018	9	7	4	7	-1.78	2	42.66	141.96417	29.5	0.3	0.28	76	66	133	54	60	12	34	D	22	62
2018	9	7	4	18	38.24	2.2	42.68467	141.97833	35.88	0.33	0.41	175	71	-102	25	26	16	24	C	86	60
2018	9	7	4	31	45.47	4.1	42.69033	141.96417	33.01	0.32	0.28	185	77	-104	20	18	20	10	A	97	62
2018	9	7	4	37	53.7	4.2	42.73117	141.98033	34.74	0.31	0.34	189	63	175	24	21	24	11	A	91	52
2018	9	7	4	57	34.47	2.4	42.72633	141.97701	32.81	0.3	0.28	264	35	-161	39	42	16	19	C	51	62
2018	9	7	5	12	31.76	2.4	42.67117	141.9845	32.87	0.32	0.29	70	31	-89	45	46	11	27	D	33	63
2018	9	7	5	18	43.52	3.4	42.69667	141.99066	33.16	0.31	0.29	101	39	7	21	19	20	13	A	90	63
2018	9	7	5	21	21.69	2.9	42.67533	141.98933	33.43	0.32	0.3	195	62	96	37	37	18	23	C	53	63
2018	9	7	6	20	15.7	2.8	42.67433	141.98866	33.36	0.35	0.38	206	83	148	40	42	12	11	D	39	68
2018	9	7	7	4	49.71	2.7	42.81367	142.02733	32.06	0.32	0.28	2	68	119	35	35	15	21	C	59	52
2018	9	7	7	13	35.65	3	42.67933	141.97884	33.58	0.35	0.38	197	61	142	41	37	13	20	D	44	65
2018	9	7	7	41	44.45	2.7	42.63733	141.97517	31.82	0.35	0.36	76	66	145	37	40	13	14	C	57	61
2018	9	7	8	20	30.54	3	42.61267	141.96367	35.19	0.38	0.64	66	65	154	40	42	14	11	D	45	55
2018	9	7	8	37	26.62	2.8	42.60183	141.93317	33.5	0.37	0.46	201	85	164	38	36	15	9	D	46	64
2018	9	7	9	29	-3.75	2.8	42.67817	141.9805	33.09	0.35	0.36	34	84	-167	40	39	12	20	D	44	65
2018	9	7	10	40	45.95	3.9	42.6825	141.96834	32.05	0.35	0.3	211	82	-102	27	20	19	8	A	91	60
2018	9	7	12	21	21.34	3.8	42.59217	141.95334	32.17	0.34	0.28	85	79	152	37	34	22	16	C	56	64
2018	9	7	12	59	49.19	2.9	42.68467	141.97084	31.62	0.31	0.24	6	63	109	35	28	16	26	C	66	55
2018	9	7	13	17	42.53	2.8	42.7175	141.97484	31.69	0.28	0.26	168	78	133	35	33	15	9	C	60	65
2018	9	7	13	21	37.44	2.7	42.7115	141.92616	16.79	0.21	0.27	210	87	-100	37	29	20	31	D	65	51
2018	9	7	13	25	24.32	5	42.70133	141.967	32.52	0.29	0.26	191	52	-114	18	20	31	21	C	96	56
2018	9	7	13	41	40.89	4	42.7805	142.01151	33.04	0.28	0.28	351	88	115	21	20	24	13	A	91	58
2018	9	7	13	52	19.8	3.1	42.74367	141.96666	31.91	0.28	0.26	24	89	139	29	30	22	24	C	83	58
2018	9	7	13	57	-1.12	4	42.65567	141.9675	30.56	0.31	0.28	34	78	147	23	20	28	9	A	97	63
2018	9	7	15	18	50.63	3.5	42.7405	141.9735	33.71	0.28	0.27	182	62	-158	28	20	25	12	A	88	62
2018	9	7	15	26	17.03	2.5	42.78333	141.91017	18.09	0.2	0.26	40	74	141	26	30	16	12	B	80	57
2018	9	7	15	42	48.63	4.2	42.76083	142.01883	35.5	0.28	0.34	170	56	106	32	26	30	20	C	73	49
2018	9	7	16	12	25.41	3.1	42.62433	141.99867	39.65	0.35	0.38	45	60	114	26	27	24	12	B	81	63
2018	9	7	16	24	36.91	2.3	42.71517	141.97816	31.8	0.28	0.27	203	62	-143	33	33	13	18	C	60	57
2018	9	7	16	36	19.94	2.5	42.81617	141.99634	32.47	0.27	0.29	182	86	-109	36	39	12	16	C	52	63
2018	9	7	16	37	45.84	2.8	42.6885	141.96049	32.48	0.29	0.25	126	83	177	20	26	20	5	A	91	63
2018	9	7	17	12	-2.15	4	42.72933	141.97833	31.94	0.27	0.25	24	65	127	28	28	25	15	B	75	62
2018	9	7	17	15	45.59	2.5	42.70583	141.98466	32.44	0.29	0.27	251	21	112	29	29	16	0	B	78	64
2018	9	7	17	50	43.87	3.1	42.66317	141.98167	29.9	0.28	0.24	33	58	127	27	30	20	16	B	79	64
2018	9	7	17	57	25.29	2.7	42.69617	141.9695	30.97	0.28	0.24	358	29	160	40	33	12	2	C	57	67
2018	9	7	18	8	12.81	2.1	42.68083	141.935	33.95	0.31	0.27	65	68	-117	41	46	8	9	D	40	69
2018	9	7	18	11	21.35	4.2	42.6025	141.96916	32.68	0.31	0.23	32	70	134	31	28	28	9	B	71	60
2018	9	7	18	24	3.68	3.5	42.70417	141.95117	34.4	0.29	0.26	182	42	-167	21	21	26	12	A	90	59
2018	9	7	18	41	24.25	3.2	42.71933	141.99451	31.47	0.26	0.23	47	86	150	22	20	26	6	A	96	57
2018	9	7	18	47	48.16	3.2	42.59	141.97766	32.28	0.31	0.23	306	85	99	20	17	20	6	A	99	61
2018	9	7	19	8	47.94	2.9	42.6505	141.9845	30.72	0.27	0.22	318	35	80	31	26	19	8	B	76	60
2018	9	7	19	58	42.84	3.7	42.64917	141.99017	31.52	0.27	0.2	24	51	113	23	23	33	25	C	93	54
2018	9	7	20	15	24.19	2.7	42.65083	141.98734	31.7	0.27	0.21	230	19	-145	36	27	15	7	B	72	60
2018	9	7	20	22	-0.27	2.9	42.69	141.97633	31.84	0.26	0.21	53	74	133	30	31	26	7	B	72	65
2018	9	7	20	26	14.41	2.4	42.67567	142.02834	33.32	0.28	0.23	42	65	120	28	31	21	7	B	74	62
2018	9	7	20	50	12.37	2.4	42.68083	141.968	28.82	0.25	0.22	245	32	174	41	25	17	11	B	63	69
2018	9	7	20	51	3.04	3.5	42.7825	141.97517	34.39	0.25	0.24	226	58	169	15	17	34	26	C	100	55
2018	9	7	21	17	45.45	2.7	42.68217	141.97617	31.73	0.26	0.21	92	56	140	39	36	26	12	D	44	62
2018	9	7	21	20	3.66	2.7	42.6195	141.944	24.99	0.25	0.25	188	83	172	21	30	23	4	B	79	63
2018	9	7	21	39	-3.23	2.2	42.8135	141.991	32.25	0.24	0.23	205	18	168	33	28	18	4	B	68	65
2018	9	7	22	29	22	3.5	42.72433	141.97667	31.57	0.24	0.19	224	51	124	27	26	26	32	D	79	57
2018	9	7	22	43	46.05	5	42.74067	142.01317	33.84	0.24	0.21	204	90	-91	22	16	40	7	A	96	56
2018	9	7	22	49	14.55	2	42.6645	141.98734	31.55	0.26	0.23	17	80	156	43	40	12	17	D	47	70
2018	9	7	23	20	47.75	2.3	42.64383	142.0015	32.85	0.26	0.22	276	48	166	29	21	23	6	B	85	63
2018	9	7	23	26	50.87	2.1	42.77217	142.04216	31.41	0.23	0.22	200	21	119	45	31	17	9	D	50	68
2018	9	7	23	31	54.46	2.9	42.67567	141.97116	30.65	0.23	0.2	173	87	-113	19	29	28	21	C	86	63
2018	9	7	23	47	4.93	3.1	42.72917	141.9725	31.87	0.23	0.19	51	42	78	29	34	32	23	C	54	62
2018	9	8	0	42	10.85	3.3	42.67517	142.01266	31.27	0.22	0.17	8	62	108	29	27	33	20	C	74	63
2018	9	8	0	53	52.56	2.3	42.6745	141.97833	33.02	0.24	0.19	183	89	-121	16	19	25	12	A	99	64
2018	9	8	0	58	33.92	2.8	42.678	141.97667	33.24	0.24	0.19	9	25	-113	20	21	30	17	B	96	66
2018	9	8	1	1	41.94	3	42.5535	141.88333	19.84	0.22	0.17	19	69	126	34	27	20	6	B	77	59
2018	9	8	1	4	32.29	2.1	42.6835	141.97333	31.34	0.26	0.22	158	82	-73	31	34	14	9	B	65	62
2018	9	8	1	28	17.23	4.3	42.66483	141.99083	34.03	0.24	0.2	194	37	112	14	17	44	13	A	100	54
2018	9	8	1	58	2.35	3.7	42.67216	141.9805	33.04	0.24	0.18	179	87	177	24	16	34	12	A	90	59
2018	9	8	2	24	32.62	2.6	42.50417	142.039	11.25	0.2	0.13	146	37	107	29	41	21	18	C	59	55
2018	9	8	2	47	45.39	2.6	42.664	141.98917	33.01	0.24	0.19	350	89	167	24	30	24	11	B	72	65
2018	9	8	3	38	10.01	2.2	42.66817	141.96434	30.33	0.23	0.18	26	90	137	17	18	22	7	A	99	64
2018	9	8	3	44	14.54	2.2	42.663	141.976	31.16	0.24	0.18	245	66	-175	44	33	20	14	C	54	63
2018	9	8	3	46	14.23	2.4	42.78584	141.9825	36.36	0.24	0.27	213	79	133	29	26	27	26	C	59	59
2018	9	8	4	19	5.25	2.3	42.66833	141.98833	32.87	0.25	0.19	148	34	24	29	23	24	17	B	86	63
2018	9	8	4	24	1.45	2	42.717	141.97667	33.6	0.25	0.22	189	56	114	38	41	14	15	D	41	67
2018	9	8	4	26	34.72	2.1	42.77683	142.011	34.08	0.23	0.23	84	33	18	40	23	16	9	B	62	70
2018	9	8	4	29	7.17	2.8	42.80833	141.99983	33.79	0.22	0.2	162	13	105	25	16	29	11	A	95	66
2018	9	8	4	38	29.14	3.9	42.72667	141.98233	36.56	0.24	0.25	206	58	-176	10	10	41	6	A	100	52
2018	9	8	4	46	31.86	2.2	42.6665	141.92667	21.94	0.19	0.18	79	63	79	39	42	16	23	D	44	54
2018	9	8	4	57	43.97	2.2	42.676	141.97667	32.52	0.24	0.19	144	74	-174	35	39	18	21	C	60	68
2018	9	8	5	37	30.65	3.9	42.6135	141.97433	31.94	0.25	0.17	311	31	101	24	22	36	26	C	95	57
2018	9	8	5	39	12.86	2.9	42.68017	141.96967	31.37	0.23	0.17	40	82	128	20	14	27	5	A	100	68
2018	9	8	5	49	9.28	4.2	42.59233	141.9585	34.23	0.27	0.2	8	39	123	14	16	44	20	B	99	53
2018	9	8	6	31	-2.24	2.9	42.5875	141.939	32.6	0.26	0.17	203	68	-157	15	11	28	14	A	98	68
2018	9	8	6	37	40.13	2.1	42.65133	141.92183	20.8	0.19	0.18	281	89	-60	38	46	13	17	D	40	61
2018	9	8	7	29	29.98	2.2	42.6635	142.00267	33.48	0.26	0.22	150	71	97	25	34	16	0	B	74	66
2018	9	8	7	42	17.9	3.7	42.676	141.9955	32.6	0.24	0.18	349	33	105	23	25	28	23	C	91	62
2018	9	8	7	46	29.24	2.2	42.64783	142.006	33.83	0.28	0.23	291	25	162	36	32	15	5	C	59	56
2018	9	8	8	3	48.52	2.6	42.67133	142.01151	36.06	0.26	0.26	189	47	102	24	24	19	10	A	91	67
2018	9	8	8	12	39.9	1.6	42.707	141.93767	21.32	0.25	0.29	250	28	-167	43	42	8	0	D	36	60
2018	9	8	8	30	37.87	2.4	42.71067	141.9955	33.17	0.24	0.21	270	1	16	39	31	18	10	C	57	65
2018	9	8	8	43	0.71	2.7	42.62617	141.99483	34.66	0.28	0.22	21	70	179	35	38	23	12	C	58	56
2018	9	8	8	51	51.14	4.1	42.70717	141.963	35.33	0.25	0.24	175	41	-179	15	12	45	7	B	100	50
2018	9	8	9	11	16.61	2.3	42.68467	141.99583	36.9	0.28	0.29	65	69	64	29	38	19	17	B	66	74
2018	9	8	9	39	17.13	2.3	42.71684	141.97517	32.82	0.24	0.21	31	69	133	25	22	17	0	A	90	59
2018	9	8	10	26	26.73	2.3	42.77167	142.037	33.48	0.24	0.23	26	38	110	36	35	15	18	C	61	65
2018	9	8	10	42	-2.65	3.1	42.6085	141.97133	31	0.25	0.17	14	78	111	23	25	35	23	C	91	58
2018	9	8	10	47	12.5	2.9	42.64333	141.99316	33.08	0.25	0.18	276	15	157	27	20	36	13	A	86	58
2018	9	8	11	41	28.4	2.2	42.67117	142.00366	34.7	0.29	0.25	314	39	107	48	54	13	43	D	27	53
2018	9	8	11	48	8.06	2.7	42.70083	141.98183	33.31	0.24	0.2	32	80	157	34	33	26	13	B	63	63
2018	9	8	11	59	9.28	2.3	42.694	141.97684	33.49	0.25	0.2	344	73	96	39	43	22	27	D	47	64
2018	9	8	12	2	25.64	3	42.7095	141.96233	34.11	0.23	0.2	204	77	-161	13	13	36	14	A	99	58
2018	9	8	12	57	22.26	2.9	42.58683	141.93401	31.95	0.26	0.17	281	90	-131	11	19	26	16	B	99	62
2018	9	8	13	25	5.33	2.5	42.68817	141.98067	34.68	0.25	0.22	145	60	159	17	17	26	13	A	95	62
2018	9	8	14	6	12.88	3.1	42.80383	142.00084	33.66	0.21	0.19	311	17	-114	35	31	28	13	B	69	66
2018	9	8	14	43	44.49	2.3	42.74633	141.97934	35.24	0.25	0.28	230	57	-145	45	39	16	19	D	39	53
2018	9	8	15	45	51.15	2.9	42.66667	141.993	33.48	0.23	0.18	246	31	156	42	38	26	18	C	50	60
2018	9	8	15	52	20.93	2.4	42.70317	141.98399	33.44	0.25	0.22	354	80	91	37	39	18	14	D	46	60
2018	9	8	16	21	36.62	4.6	42.69767	141.9545	37.98	0.25	0.24	185	51	-175	15	13	44	7	A	100	58
2018	9	8	16	36	4.42	3.8	42.60817	141.97017	31.23	0.23	0.15	49	87	108	19	19	37	10	A	96	64
2018	9	8	16	39	-5.28	3.1	42.69283	141.978	33.49	0.22	0.18	184	60	179	41	35	40	12	C	51	66
2018	9	8	16	39	39.01	2.8	42.69117	141.98016	40.09	0.29	0.31	123	90	-127	23	23	21	22	C	88	66
2018	9	8	17	4	-3.7	3.9	42.58	141.94566	32.02	0.24	0.16	13	70	165	10	8	49	13	A	100	59
2018	9	8	17	10	40.95	2.3	42.79633	141.923	18.34	0.14	0.15	212	38	152	26	26	22	16	B	82	54
2018	9	8	17	35	27.81	2.8	42.57533	141.92799	30.3	0.24	0.17	126	35	114	24	47	26	27	C	55	66
2018	9	8	17	37	36.47	2	42.65434	141.92	19.11	0.17	0.16	129	80	99	29	40	17	23	C	62	53
2018	9	8	18	21	6.7	4.8	42.69367	141.968	33.33	0.21	0.17	205	80	-133	14	11	61	15	B	100	60
2018	9	8	18	36	53.38	1.6	42.79167	141.931	16.64	0.16	0.17	12	63	154	51	52	15	21	D	40	57
2018	9	8	18	47	11.8	2.3	42.50417	142.04449	10.11	0.18	0.12	181	68	95	26	35	22	27	C	72	49
2018	9	8	18	51	27.18	2.2	42.73817	141.97783	34.45	0.23	0.22	200	60	99	28	36	18	13	B	61	69
2018	9	8	18	55	8.21	2.1	42.732	141.98767	32.99	0.22	0.19	290	79	103	42	47	13	6	D	42	64
2018	9	8	19	8	0.25	2.3	42.6965	141.98466	34	0.22	0.19	235	86	-157	42	40	23	10	D	47	70
2018	9	8	19	29	45.69	2.7	42.61217	141.95784	29.01	0.21	0.15	174	40	107	32	38	30	18	C	68	64
2018	9	8	19	53	22.37	2.5	42.6645	142.00816	36.54	0.25	0.25	77	73	107	28	34	23	13	B	70	75
2018	9	8	20	23	19.53	2.2	42.67983	142.01433	34.47	0.24	0.21	144	43	106	33	32	22	11	B	66	73
2018	9	8	21	0	37.84	3.6	42.67283	141.90117	19.76	0.16	0.13	19	72	136	21	12	41	27	C	94	53
2018	9	8	21	4	-0.38	2.7	42.676	141.9045	19.02	0.15	0.13	224	86	-98	31	33	34	44	D	56	53
2018	9	8	21	6	1.24	2.2	42.67367	141.99733	33.03	0.23	0.19	209	11	134	35	26	24	17	B	76	71
2018	9	8	21	41	21.57	2.8	42.68333	141.9745	34.11	0.22	0.18	183	62	-149	16	12	41	14	A	100	62
2018	9	8	21	55	40.08	2.9	42.6905	141.96767	32.59	0.21	0.16	27	28	-40	29	28	30	7	B	69	66
2018	9	8	22	37	10.52	3	42.672	141.90167	19.12	0.15	0.13	211	85	-133	27	22	42	36	D	93	54
2018	9	8	22	50	4.47	2.8	42.655	142.00417	37.44	0.25	0.24	39	74	139	28	32	46	18	B	77	60
2018	9	8	22	59	15.65	1.7	42.76883	141.90233	9.89	0.11	0.12	214	73	121	35	31	20	21	C	63	58
2018	9	8	23	0	43.16	3.6	42.62533	141.98167	32.74	0.24	0.16	223	90	-152	11	12	49	14	A	99	58
2018	9	8	23	11	52.38	4.2	42.78883	142.01717	33.29	0.2	0.17	86	13	10	20	11	61	17	B	99	56
2018	9	9	0	5	3.86	2.1	42.69517	141.97867	32.95	0.23	0.19	358	89	114	37	36	23	8	D	37	69
2018	9	9	0	32	30.74	2.4	42.68867	141.978	32.6	0.21	0.17	174	44	120	39	32	32	25	D	46	69
2018	9	9	0	39	31.98	2.6	42.61517	141.97433	34.88	0.25	0.21	319	27	-172	26	18	38	7	A	89	58
2018	9	9	0	43	23.64	2	42.7115	141.9705	37.19	0.25	0.27	49	84	-120	32	44	18	7	D	46	77
2018	9	9	0	49	13.32	2.3	42.67484	141.97816	37.51	0.25	0.25	219	65	-132	37	20	26	15	B	66	72
2018	9	9	1	14	46.44	1.9	42.59583	142.05583	7.29	0.13	0.13	45	53	-112	38	39	12	18	C	51	63
2018	9	9	2	1	0.43	2.1	42.67167	141.98849	32.95	0.24	0.2	83	23	-61	43	43	18	13	D	36	71
2018	9	9	2	8	15.5	2.3	42.6655	141.98967	36.24	0.25	0.24	300	26	-125	37	30	25	15	B	63	68
2018	9	9	2	12	36.6	2.8	42.58983	141.94116	32.33	0.24	0.17	220	88	-149	13	12	37	18	B	100	61
2018	9	9	2	19	38.7	2.5	42.64267	142.0005	34.01	0.23	0.18	45	64	131	18	25	31	5	A	91	61
2018	9	9	2	25	19.71	3.8	42.62	141.978	33.65	0.23	0.17	11	79	145	15	11	48	14	A	100	61
2018	9	9	2	40	46.95	2	42.66433	141.97301	30.55	0.22	0.18	196	76	-174	29	24	17	13	B	84	67
2018	9	9	2	50	48.05	2.8	42.7105	141.96767	33.94	0.21	0.17	184	55	-165	14	10	41	13	A	100	60
2018	9	9	2	59	36.26	2.3	42.79517	142.00549	33.69	0.21	0.19	224	54	-165	30	30	25	11	B	75	59
2018	9	9	3	9	52.4	2	42.77883	141.99434	33.72	0.23	0.21	258	31	-141	39	37	26	16	C	52	60
2018	9	9	3	12	24.14	4.3	42.72233	142.01033	32.07	0.2	0.16	141	18	61	21	22	44	15	B	92	59
2018	9	9	3	26	52.62	3.1	42.67517	141.98784	31.92	0.21	0.15	32	83	146	18	16	36	7	A	97	61
2018	9	9	3	38	19.34	2	42.76833	142.00017	32.98	0.22	0.2	220	72	-161	41	42	24	12	D	44	60
2018	9	9	3	41	1.84	2.6	42.67383	141.98367	38.12	0.25	0.24	354	37	82	32	25	27	14	B	78	69
2018	9	9	4	20	33.78	2.8	42.61633	141.96584	30.51	0.22	0.15	142	45	111	37	42	38	10	C	53	71
2018	9	9	4	54	35.16	3.6	42.61333	141.96384	30.64	0.22	0.15	36	87	158	14	9	54	17	B	100	62
2018	9	9	4	57	31.74	1.6	42.68583	141.90633	18.31	0.15	0.16	130	83	-142	37	39	9	28	C	55	71
2018	9	9	5	6	50.26	2.1	42.695	141.97884	33.67	0.22	0.19	315	50	114	37	39	27	16	C	58	67
2018	9	9	5	24	40.4	2.9	42.70567	142.01601	31.02	0.2	0.15	161	13	111	22	9	41	17	B	100	58
2018	9	9	5	28	45.2	3	42.5865	141.903	19.45	0.18	0.14	195	41	67	15	15	42	11	A	100	57
2018	9	9	5	30	35.44	2.3	42.75267	141.99516	33.63	0.21	0.18	209	82	123	27	36	33	14	B	65	66
2018	9	9	5	33	28.87	1.9	42.58567	141.90117	17.61	0.19	0.16	352	36	136	32	34	28	29	C	64	55
2018	9	9	6	10	35.11	3.4	42.67267	141.89566	19.75	0.16	0.13	24	73	140	29	15	37	27	C	79	55
2018	9	9	6	31	10.8	3.3	42.69267	141.96916	32.6	0.21	0.16	37	33	13	16	8	41	13	A	100	66
2018	9	9	7	32	32.49	2.1	42.68667	141.983	32.93	0.23	0.19	187	62	93	35	35	20	7	C	56	66
2018	9	9	7	41	46.01	3	42.667	141.97484	30.9	0.21	0.15	28	74	122	24	21	32	20	B	93	62
2018	9	9	8	28	28.64	2.5	42.7975	142.0015	33.35	0.21	0.18	359	85	126	33	19	39	9	B	67	60
2018	9	9	8	30	36.33	2.9	42.678	141.96533	31.35	0.21	0.15	188	75	155	29	24	45	24	C	65	66
2018	9	9	9	38	36.58	2.9	42.59617	141.94684	27.72	0.21	0.15	204	83	-165	12	9	43	11	A	100	62
2018	9	9	9	39	52.03	2.3	42.67817	141.98784	33.49	0.23	0.2	221	82	-162	32	29	26	22	C	68	64
2018	9	9	9	47	10.89	2.4	42.6815	141.9935	34.35	0.24	0.21	160	13	73	30	25	30	17	B	74	59
2018	9	9	10	48	5.94	1.9	42.59083	142.0515	8.15	0.13	0.13	346	59	-135	32	28	17	18	B	76	50
2018	9	9	11	11	-3.99	2.6	42.62217	141.9785	32.5	0.23	0.16	170	47	124	25	30	37	21	C	77	62
2018	9	9	11	43	36.51	2.8	42.67433	141.98183	32.97	0.22	0.17	326	41	80	22	17	39	16	B	99	65
2018	9	9	11	45	34.39	2.8	42.65816	141.99716	32.37	0.22	0.16	48	76	147	16	11	43	11	A	100	58
2018	9	9	12	42	45.73	4	42.66084	141.98883	33.92	0.23	0.18	297	14	-180	17	19	55	9	A	98	57
2018	9	9	12	49	13.57	3.5	42.73734	141.97484	33.84	0.2	0.17	245	55	165	14	8	38	11	A	100	54
2018	9	9	12	55	-4.08	1.9	42.67133	141.98151	32.78	0.24	0.21	307	32	116	37	33	15	8	C	57	72
2018	9	9	13	12	12.51	3	42.66084	142.00101	37.91	0.24	0.23	335	42	66	21	17	45	8	A	100	62
2018	9	9	14	5	-3.9	1.9	42.73683	141.9735	36.55	0.25	0.26	196	71	116	38	46	19	13	D	41	63
2018	9	9	14	41	-5.46	2.2	42.61633	141.99049	35.09	0.26	0.22	266	35	110	41	28	26	23	C	60	56
2018	9	9	15	9	49.14	2.9	42.68367	141.98283	31.15	0.2	0.14	227	76	-169	22	23	36	25	C	84	62
2018	9	9	15	11	29.48	2	42.81533	142.00267	32.52	0.21	0.19	337	88	117	29	38	18	13	C	60	62
2018	9	9	15	28	10.09	1.7	42.65983	141.88867	23.01	0.19	0.19	294	34	77	40	34	13	11	C	51	65
2018	9	9	15	28	54.37	2.2	42.71067	141.9865	34.2	0.24	0.21	167	58	87	34	40	21	21	C	53	66
2018	9	9	15	44	11.22	2.6	42.72066	141.98134	32.98	0.2	0.16	10	34	78	30	27	26	13	B	76	60
2018	9	9	17	9	16.79	2.8	42.65567	141.99001	33.01	0.22	0.16	185	62	135	26	32	43	20	C	65	62
2018	9	9	17	24	45	2.2	42.66633	141.99249	34.11	0.23	0.19	149	61	97	22	28	28	13	B	89	63
2018	9	9	18	5	11.63	3.4	42.57933	141.946	32.78	0.23	0.15	190	78	-168	12	8	44	11	A	100	66
2018	9	9	18	7	45.5	1.8	42.65933	141.99333	34.1	0.27	0.23	5	55	131	44	41	11	17	D	40	66
2018	9	9	18	9	2.77	2	42.65583	141.99133	34.42	0.25	0.21	343	46	138	46	47	12	11	D	35	64
2018	9	9	18	16	41.41	3.8	42.5995	141.95799	34.92	0.24	0.19	205	61	-158	11	10	47	8	A	100	54
2018	9	9	18	28	12.6	2.8	42.67967	141.899	18.04	0.13	0.12	194	90	-123	31	23	33	24	C	84	64
2018	9	9	18	34	-4.32	1.7	42.67	141.97533	31.36	0.24	0.21	305	47	133	44	42	14	20	D	33	76
2018	9	9	18	35	14.97	2.6	42.58533	141.97517	34.38	0.24	0.19	149	48	112	13	23	36	8	A	94	63
2018	9	9	19	15	44.75	2.5	42.6985	141.97284	31.92	0.2	0.15	239	80	-128	25	19	39	20	B	87	65
2018	9	9	19	20	13.23	1.9	42.74683	141.89883	15.54	0.12	0.12	356	79	140	36	35	24	30	D	59	57
2018	9	9	19	37	50.72	1.7	42.6775	141.90633	17.19	0.14	0.14	61	76	148	33	36	16	11	C	52	63
2018	9	9	19	58	35.99	1.7	42.69267	141.98367	33.51	0.23	0.21	338	82	112	35	42	14	13	D	49	62
2018	9	9	20	13	-4.1	2.3	42.74067	141.98399	33.8	0.2	0.17	214	56	171	40	28	32	18	B	64	58
2018	9	9	20	29	19.61	1.7	42.68517	141.968	31.2	0.24	0.21	154	57	132	45	46	13	14	D	36	68
2018	9	9	20	37	40.63	1.7	42.67433	141.89717	16.7	0.15	0.16	9	67	83	53	57	8	15	D	19	53
2018	9	9	20	46	7.44	3.2	42.70517	141.96834	33.54	0.2	0.16	104	26	20	23	25	41	11	B	77	66
2018	9	9	20	50	29.14	2.1	42.73383	141.97917	31.72	0.2	0.17	2	29	129	36	26	25	10	B	74	63
2018	9	9	21	6	5.73	3.1	42.69667	141.972	32.96	0.2	0.16	2	44	84	28	21	39	19	B	87	64
2018	9	9	21	39	24.41	1.7	42.758	141.97884	34.03	0.22	0.21	84	78	85	40	46	15	13	D	40	70
2018	9	9	21	56	31.53	3.1	42.59317	141.96916	33.92	0.23	0.17	140	44	88	12	21	42	12	A	99	64
2018	9	9	22	7	46.39	3.2	42.81067	142.00549	33.08	0.19	0.16	347	87	120	10	13	49	12	A	100	63
2018	9	9	22	22	56.53	2.4	42.62717	141.9055	18.98	0.15	0.13	16	81	131	27	19	32	17	B	77	61
2018	9	9	22	25	14.39	1.2	42.70883	141.91234	11.92	0.13	0.16	351	84	135	39	44	11	18	D	42	76
2018	9	9	22	55	13.41	5.5	42.7845	141.98334	34.44	0.2	0.17	98	24	11	15	12	64	15	A	100	55
2018	9	9	23	6	40.71	1.4	42.66733	141.90266	18.09	0.16	0.17	59	71	149	41	36	14	18	C	62	64
2018	9	9	23	14	4.14	1.7	42.78584	141.99367	35.05	0.24	0.26	32	31	120	42	34	18	18	D	50	62
2018	9	9	23	36	4.43	2	42.78683	141.985	33.46	0.2	0.18	58	83	160	22	22	27	5	A	91	71
2018	9	9	23	49	13.51	2.4	42.67817	142.0045	32.43	0.2	0.16	170	55	108	17	21	42	12	A	99	66
2018	9	9	23	51	35.33	2.2	42.655	141.97783	30.23	0.2	0.15	253	62	179	32	23	38	20	B	75	68
2018	9	10	0	6	-4.57	1.6	42.788	141.989	33.85	0.24	0.24	41	83	88	29	41	20	9	C	57	63
2018	9	10	0	18	32.35	1.7	42.66617	141.99249	37.75	0.27	0.28	301	36	144	45	34	15	17	D	48	68
2018	9	10	0	25	41.19	2.8	42.658	142.0125	35.75	0.23	0.22	150	15	47	20	19	41	12	A	96	60
2018	9	10	0	46	36.24	2.5	42.59967	141.95816	30.3	0.22	0.16	132	5	-143	42	44	35	20	C	55	73
2018	9	10	0	49	3.01	3.3	42.67083	141.97467	30.34	0.19	0.15	281	37	-170	18	13	49	8	A	97	63
2018	9	10	1	3	1.1	1.9	42.79483	141.92467	13.64	0.12	0.16	25	83	159	31	30	32	28	C	74	54
2018	9	10	1	58	-4.09	2.8	42.78133	141.96933	34.02	0.2	0.18	223	74	140	17	15	46	19	B	100	56
2018	9	10	2	2	6.55	2	42.78983	141.98351	34.2	0.22	0.2	345	83	117	19	35	24	20	B	79	65
2018	9	10	2	8	47.05	3.6	42.56833	141.957	32.86	0.24	0.17	243	17	157	27	12	44	19	B	91	69
2018	9	10	2	20	-3.57	3.9	42.667	141.99234	32.3	0.21	0.16	320	44	43	20	16	55	13	A	99	62
2018	9	10	2	27	24.45	2.5	42.81816	142.01833	31.76	0.19	0.17	135	38	91	16	10	35	11	A	100	70
2018	9	10	2	29	43.06	1.5	42.6585	141.91434	14.01	0.15	0.17	285	11	-174	41	36	12	8	D	50	65
2018	9	10	2	35	50.42	1.7	42.6655	141.987	32.84	0.24	0.21	3	43	122	38	27	20	16	C	56	62
2018	9	10	2	38	34.31	2.7	42.6465	141.9915	33.53	0.22	0.17	250	19	169	21	11	40	6	A	100	66
2018	9	10	2	45	30.64	1.9	42.65833	141.9915	33.95	0.23	0.2	167	46	106	30	37	23	19	B	66	70
2018	9	10	2	55	26.8	3.7	42.713	141.9785	33.64	0.21	0.17	167	37	53	21	22	55	13	A	87	56
2018	9	10	3	2	22.51	2.1	42.6245	141.99966	34.98	0.25	0.22	196	57	137	28	32	33	20	B	71	62
2018	9	10	3	4	5.25	1.2	42.675	141.9005	13.28	0.15	0.18	148	62	106	49	52	10	42	D	34	64
2018	9	10	3	10	20.27	1.9	42.5935	141.99333	34.23	0.25	0.2	137	45	97	31	38	24	16	B	64	65
2018	9	10	3	48	11.59	4.2	42.67183	141.9845	32.65	0.21	0.16	170	44	103	19	13	59	11	A	100	60
2018	9	10	4	10	40.57	3.7	42.6555	141.98717	31.98	0.21	0.15	16	38	130	12	11	53	12	A	100	59
2018	9	10	4	47	53.38	1.9	42.62617	141.97617	31.2	0.23	0.18	228	85	-60	33	41	21	23	C	57	60
2018	9	10	4	58	28.39	2.8	42.682	141.98416	34.02	0.22	0.18	262	44	165	28	17	50	17	B	86	63
2018	9	10	5	19	55.05	2.5	42.666	141.98199	31.49	0.21	0.16	209	85	-97	24	29	35	15	B	81	63
2018	9	10	5	24	19.09	2.2	42.658	141.99083	32.27	0.23	0.18	152	52	89	29	35	25	18	B	65	55
2018	9	10	5	32	5.62	2.8	42.67	141.98616	32.85	0.22	0.18	331	36	112	15	13	37	10	A	100	70
2018	9	10	5	47	52.74	2.2	42.778	141.96899	33.36	0.21	0.19	211	39	149	43	23	23	11	C	59	61
2018	9	10	5	51	14.87	4.3	42.5675	141.94783	29.45	0.22	0.16	15	35	138	13	10	55	7	A	100	66
2018	9	10	6	6	-3.36	3.3	42.66117	141.98183	30.86	0.2	0.16	318	37	77	24	17	44	11	A	97	62
2018	9	10	6	58	19.05	1.6	42.70917	141.97749	34.74	0.27	0.25	334	55	101	49	54	13	32	D	33	68
2018	9	10	8	7	34.02	1.8	42.77317	141.90134	6.65	0.11	0.15	179	64	-169	45	44	14	14	D	40	49
2018	9	10	9	18	48.59	2.8	42.71367	141.98466	32.73	0.21	0.17	156	16	63	32	20	45	18	B	76	64
2018	9	10	10	43	3.04	1.9	42.6955	141.98083	32.65	0.25	0.22	5	75	134	35	43	10	22	C	56	67
2018	9	10	10	45	13.37	2.4	42.82233	141.99884	32.68	0.2	0.18	249	56	-171	38	24	31	28	C	63	56
2018	9	10	11	11	35.1	2.9	42.7045	141.97816	33.21	0.21	0.16	186	85	-162	13	12	37	13	A	100	64
2018	9	10	11	16	7.46	2.5	42.64233	142.00017	34.73	0.24	0.21	18	70	140	30	37	20	16	B	72	60
2018	9	10	11	53	22.5	2.9	42.67717	141.9915	33.54	0.22	0.17	218	17	112	28	20	37	13	A	87	65
2018	9	10	11	54	50.51	2.8	42.73517	141.97084	31.32	0.2	0.17	25	60	158	11	12	37	6	A	100	58
2018	9	10	12	25	22.71	4.3	42.70016	141.97467	31.83	0.2	0.15	64	85	122	18	16	53	11	A	99	64
2018	9	10	15	7	44.7	1.6	42.77033	141.903	7.64	0.11	0.17	330	73	116	45	46	17	25	D	31	59
2018	9	10	15	8	36.57	2.6	42.72683	141.98584	33.18	0.21	0.17	229	71	123	21	34	29	16	B	76	63
2018	9	10	15	23	-4.31	2	42.82	142.01649	31.67	0.26	0.27	185	43	154	47	38	15	17	D	48	74
2018	9	10	15	37	10.58	4	42.73567	141.97234	29.8	0.18	0.16	184	21	45	19	16	66	17	B	100	61
2018	9	10	15	47	41.9	3.8	42.59767	141.98784	36.1	0.24	0.21	235	32	103	22	16	57	11	A	96	60
2018	9	10	16	21	21.07	4.4	42.66583	141.98416	39.61	0.25	0.24	166	61	144	23	24	49	7	B	78	56
2018	9	10	17	23	32.71	2.8	42.66717	142.002	32.5	0.21	0.17	325	48	71	25	22	39	16	B	91	63
2018	9	10	18	25	7.11	1.7	42.6505	141.90883	15.49	0.16	0.17	277	24	175	35	24	15	1	B	70	62
2018	9	10	19	0	34.15	3.4	42.6025	141.9735	36.64	0.25	0.22	178	49	151	16	20	52	12	A	96	61
2018	9	10	19	32	17.95	1.9	42.6655	141.93617	21.58	0.18	0.19	285	18	172	35	24	24	9	B	74	66
2018	9	10	19	44	7.62	1.8	42.72633	141.98599	33.21	0.23	0.23	213	67	-165	43	41	19	25	D	44	66
2018	9	10	19	54	12.23	2.1	42.67183	141.981	33.1	0.23	0.2	340	79	107	21	34	22	17	B	73	63
2018	9	10	21	19	31.26	1.8	42.83233	141.99634	30.38	0.21	0.22	212	60	-113	47	51	17	32	D	35	74
2018	9	10	21	21	49.04	2.2	42.6705	141.97116	29.52	0.2	0.19	212	61	172	19	10	34	16	B	100	70
2018	9	10	21	25	46.84	1.7	42.73517	141.9005	10.87	0.12	0.15	157	37	64	31	27	27	28	C	70	54
2018	9	10	21	26	34.61	1.5	42.77483	141.90016	6.8	0.1	0.15	185	21	136	39	36	18	18	C	55	58
2018	9	10	21	50	14.53	2	42.66783	141.97316	30.4	0.21	0.19	2	34	-100	34	35	24	25	C	68	72
2018	9	10	22	23	28.42	1.7	42.65133	141.9725	29.6	0.22	0.24	307	13	174	43	32	16	11	D	50	73
2018	9	10	22	40	6	2.2	42.81683	142.0195	31.49	0.19	0.19	132	23	51	29	15	30	11	A	88	72
2018	9	10	22	42	35.26	1.6	42.787	141.98567	33.99	0.23	0.23	358	82	109	27	44	15	11	C	56	69
2018	9	10	22	56	43	2	42.64734	142.00517	40.8	0.29	0.29	356	50	93	34	41	20	15	D	45	67
2018	9	10	23	23	2.89	3.8	42.59683	141.98151	36.67	0.26	0.22	140	40	116	13	19	52	10	A	100	57
2018	9	10	23	37	5.5	2.3	42.63766	141.9045	14.72	0.15	0.15	35	54	135	14	14	40	12	A	100	57
2018	9	11	0	11	25.01	1.8	42.66567	141.93767	21.54	0.17	0.19	182	11	81	34	18	27	5	B	80	64
2018	9	11	0	16	43.62	1.8	42.72133	141.9865	32.77	0.22	0.2	256	48	178	44	29	23	24	C	53	67
2018	9	11	0	34	39.79	2	42.79	141.95351	30.83	0.19	0.18	221	55	-173	31	21	30	10	B	77	64
2018	9	11	0	42	39.66	1.8	42.74033	141.9115	6.16	0.1	0.14	191	66	166	36	39	25	26	D	47	50
2018	9	11	0	56	29.56	2.4	42.81816	142.01266	31.98	0.19	0.17	162	47	49	25	19	33	11	A	90	64
2018	9	11	0	58	43.91	2.5	42.65017	141.994	31.77	0.21	0.17	29	82	140	15	12	32	20	C	100	66
2018	9	11	1	43	36.62	2	42.72367	141.99234	33.89	0.23	0.21	352	32	56	33	27	19	18	B	69	69
2018	9	11	2	2	16.72	2.3	42.83067	141.995	31.89	0.2	0.18	229	39	150	38	32	32	20	C	51	62
2018	9	11	2	10	33.17	3.2	42.6315	141.99699	35.77	0.24	0.21	181	51	113	18	24	46	12	A	96	58
2018	9	11	2	40	51.96	2.1	42.69983	141.89934	18.12	0.15	0.16	25	85	120	35	31	28	26	C	68	66
2018	9	11	3	3	6.73	1.8	42.74683	141.88451	9.03	0.11	0.14	130	49	84	48	48	22	26	D	34	58
2018	9	11	4	16	12.54	3.2	42.57833	141.97917	34.37	0.25	0.18	14	37	-63	18	20	48	27	C	93	59
2018	9	11	4	53	32.53	1.8	42.65467	141.995	32.75	0.26	0.23	93	83	78	29	41	19	10	B	61	73
2018	9	11	4	58	45.97	5	42.70267	142.00017	31.68	0.2	0.16	249	25	169	14	11	67	16	B	100	56
2018	9	11	5	27	23.14	2.3	42.68067	141.9725	33.19	0.23	0.19	271	49	67	45	25	30	8	C	53	68
2018	9	11	7	44	42.73	2	42.65333	142.00349	38.35	0.29	0.29	61	15	-13	44	41	12	21	D	44	57
2018	9	11	7	57	2.57	3.1	42.74467	141.97549	32.77	0.2	0.16	157	51	93	19	25	38	14	A	96	64
2018	9	11	8	14	36.17	2.5	42.6485	142.00734	40.44	0.28	0.28	0	89	88	28	38	22	5	B	61	67
2018	9	11	9	2	40.93	2.6	42.73317	141.99916	33.92	0.21	0.2	124	56	92	24	33	27	14	B	76	58
2018	9	11	10	29	52.23	2.4	42.81917	142.00766	32.55	0.21	0.2	84	52	144	41	40	22	12	D	49	67
2018	9	11	10	47	50.85	1.9	42.74183	141.91634	7.09	0.11	0.15	179	27	145	46	45	16	34	D	37	55
2018	9	11	11	5	23.55	2	42.735	141.91267	6.71	0.11	0.15	196	81	163	50	49	15	18	D	33	45
2018	9	11	11	14	33.34	3.5	42.6865	141.96434	33.91	0.21	0.17	30	36	-83	17	15	57	10	A	100	59
2018	9	11	12	26	32.99	4	42.73233	141.976	32.5	0.2	0.16	197	83	-160	21	18	64	24	C	90	59
2018	9	11	12	30	42.39	1.9	42.66516	141.94701	25.05	0.19	0.21	99	21	-56	40	40	15	17	D	40	72
2018	9	11	12	31	13.13	2.5	42.684	141.96567	37.3	0.24	0.24	30	22	17	39	30	29	22	C	64	67
2018	9	11	12	49	32.19	2.3	42.73183	141.96733	29.3	0.2	0.21	60	81	114	24	41	25	12	C	59	72
2018	9	11	12	54	50.59	4.3	42.73833	141.9025	8.4	0.11	0.13	57	52	168	27	34	42	23	C	73	41
2018	9	11	12	55	52.33	3.5	42.74083	141.91167	6.92	0.1	0.13	214	78	171	41	33	20	22	D	49	56
2018	9	11	12	58	31.59	3.6	42.6915	141.96834	30.56	0.19	0.15	200	74	-174	27	19	39	25	C	85	62
2018	9	11	13	37	39.08	1.8	42.66217	141.88901	16.07	0.2	0.22	114	69	121	32	37	10	20	C	61	59
2018	9	11	13	46	15.7	1.7	42.709	141.91333	9.99	0.12	0.17	187	90	-88	38	44	13	21	D	45	64
2018	9	11	15	43	12.65	1.9	42.77267	141.89934	7.83	0.11	0.15	352	79	114	46	45	15	34	D	35	55
2018	9	11	16	55	46.21	2.2	42.7465	141.90916	11.05	0.11	0.14	350	57	179	23	32	28	24	C	77	62
2018	9	11	17	29	46.73	2.9	42.66467	141.95734	26.91	0.18	0.17	100	14	-36	34	32	44	31	D	64	57
2018	9	11	18	11	21	3.7	42.59933	142.01016	40.19	0.26	0.24	220	43	114	26	21	62	23	C	91	62
2018	9	11	18	15	52.98	3.1	42.57867	141.97667	32.82	0.23	0.16	281	29	-106	14	10	44	9	A	100	69
2018	9	11	18	30	5.24	1.3	42.73734	141.91251	6.45	0.12	0.17	83	87	120	58	64	8	39	D	17	57
2018	9	11	18	53	38.89	1.9	42.82467	142.00133	32.07	0.21	0.21	74	34	-7	42	29	20	17	C	62	68
2018	9	11	19	7	33.35	4.7	42.822	141.99916	31.92	0.18	0.16	239	4	163	15	10	69	13	A	100	59
2018	9	11	19	35	49.83	2.8	42.536	141.95317	31.01	0.24	0.17	349	7	-88	25	9	49	14	A	92	67
2018	9	11	19	46	22.62	1.9	42.651	141.99167	31.61	0.24	0.21	16	14	-140	35	29	20	18	B	65	76
2018	9	11	19	54	17.25	2	42.659	141.99316	33.37	0.24	0.2	176	61	90	34	36	25	20	B	62	69
2018	9	11	20	9	3.39	2.1	42.65583	142.00233	32.68	0.23	0.2	163	63	114	25	35	24	13	B	70	67
2018	9	11	20	39	48.57	2.1	42.751	141.99434	34.03	0.23	0.21	95	34	2	33	27	33	18	B	72	66
2018	9	11	20	41	11.42	2.4	42.72867	141.95233	34.77	0.23	0.2	21	31	3	21	15	28	9	A	98	60
2018	9	11	20	40	43.62	2.1	42.73483	141.87801	14.8	0.13	0.15	9	21	155	25	17	30	17	B	96	63
2018	9	11	20	51	32.17	4.2	42.576	141.978	34.75	0.24	0.19	282	39	-148	14	9	52	7	A	100	58
2018	9	11	22	17	39.38	2.2	42.65733	141.99066	32.46	0.22	0.18	175	65	102	21	31	28	12	B	81	64
2018	9	11	22	18	41.06	2.1	42.714	141.97966	31.39	0.2	0.18	54	79	97	19	32	29	5	B	80	69
2018	9	11	22	45	1.5	2	42.69817	141.97501	33.98	0.23	0.2	318	83	94	24	30	29	21	C	84	63
2018	9	11	22	57	16.61	4.1	42.59533	141.9525	31.84	0.22	0.15	171	74	-153	10	10	66	16	B	100	62
2018	9	11	23	52	42.99	2.1	42.81783	141.99583	32.2	0.19	0.18	206	38	160	39	29	29	21	C	67	70
2018	9	12	0	37	37.77	1.9	42.67583	141.97116	30.36	0.2	0.17	181	86	-174	24	25	26	16	B	90	71
2018	9	12	0	41	43.56	1.9	42.65816	141.99533	35.44	0.24	0.22	199	72	-86	28	35	23	13	B	69	70
2018	9	12	0	43	10.6	1.8	42.82933	141.9805	32.16	0.23	0.23	292	61	92	29	44	16	6	D	42	67
2018	9	12	1	55	31.08	2.3	42.75317	141.99533	34.53	0.2	0.18	260	44	168	30	23	42	20	C	79	56
2018	9	12	2	2	4.79	2.8	42.69	141.98784	35.08	0.21	0.2	222	77	-90	20	27	42	14	A	87	64
2018	9	12	2	28	43.84	2.1	42.7335	141.97951	32.84	0.21	0.19	343	89	96	23	39	27	13	B	66	58
2018	9	12	3	5	2.19	1.7	42.705	141.9805	33.21	0.23	0.2	26	86	125	28	39	20	15	B	71	64
2018	9	12	3	43	47.58	2.3	42.659	141.90184	19.61	0.15	0.13	13	90	105	25	27	37	20	C	80	57
2018	9	12	3	59	10.07	1.3	42.7365	141.92133	8.18	0.11	0.13	208	86	-97	33	33	12	10	B	69	61
2018	9	12	4	24	22.64	1.3	42.73567	141.88817	8.76	0.11	0.13	166	27	-142	38	35	14	14	C	52	65
2018	9	12	4	39	21.89	4	42.76983	142.00067	34.68	0.2	0.18	215	40	160	11	7	65	13	A	100	53
2018	9	12	5	19	20.81	3.2	42.65	141.99567	35.68	0.23	0.2	66	4	-23	25	18	53	12	A	90	58
2018	9	12	5	47	18.48	3.1	42.60317	141.98283	36.38	0.24	0.21	177	45	132	16	21	46	13	A	95	59
2018	9	12	5	50	17.61	1.5	42.834	141.91051	10.02	0.11	0.16	293	88	-141	51	56	13	36	D	26	74
2018	9	12	5	54	11.87	2	42.64317	141.92883	26.34	0.19	0.17	135	57	153	31	42	22	14	D	49	72
2018	9	12	6	47	17.7	3.2	42.76567	141.99916	32.26	0.19	0.15	247	21	165	23	14	44	4	A	93	62
2018	9	12	6	50	34.14	3.3	42.63383	141.995	35.77	0.23	0.21	33	89	145	11	12	50	7	A	100	59
2018	9	12	7	59	30.33	2.2	42.66683	142.01733	36.34	0.25	0.25	180	50	111	27	32	26	11	B	72	66
2018	9	12	8	0	23.65	2.6	42.74567	141.98151	32.32	0.19	0.16	346	75	165	13	16	29	12	A	100	65
2018	9	12	8	10	-2.96	3.3	42.69267	141.9715	32.56	0.2	0.15	353	14	-84	18	9	47	6	A	100	62
2018	9	12	9	47	33.02	2.4	42.799	142.0195	32.05	0.2	0.17	157	89	-108	26	38	18	5	C	58	62
2018	9	12	10	55	46.81	2.8	42.72	141.97417	31.94	0.2	0.15	18	31	94	34	19	39	19	B	70	61
2018	9	12	11	13	7.24	3.1	42.70667	141.96783	32.66	0.2	0.15	342	77	96	23	34	33	17	B	75	64
2018	9	12	11	30	30.59	2	42.675	141.9875	33.13	0.23	0.19	17	50	135	36	34	16	20	C	61	57
2018	9	12	11	34	26.04	3.3	42.6455	142.00116	34.1	0.22	0.17	174	53	104	17	19	42	6	A	100	61
2018	9	12	12	11	12.88	2.1	42.73633	141.91234	11.21	0.11	0.12	49	80	106	40	43	15	17	D	42	56
2018	9	12	12	13	34.97	2.4	42.7375	141.91434	11.95	0.1	0.11	247	74	-162	11	11	33	14	A	100	56
2018	9	12	12	15	38.39	1.4	42.73133	141.91299	10.13	0.13	0.14	139	83	-133	52	55	8	31	D	22	60
2018	9	12	13	20	30.57	2.5	42.662	141.98351	34.95	0.23	0.2	140	71	165	31	38	24	16	B	64	58
2018	9	12	13	24	35.66	2.3	42.62567	141.99683	36.21	0.25	0.23	142	50	117	36	40	18	22	D	50	58
2018	9	12	13	31	39.73	3	42.65633	141.97633	30.36	0.2	0.14	104	8	21	26	19	44	13	A	86	66
2018	9	12	14	12	1.29	3.6	42.8155	142.04716	30.61	0.18	0.15	168	27	85	19	14	53	13	A	97	64
2018	9	12	14	56	52.57	2.6	42.70183	141.97284	32.11	0.2	0.16	2	22	-175	21	14	28	9	A	98	66
2018	9	12	15	8	20.2	2.3	42.66183	141.99017	32.55	0.23	0.18	345	26	97	37	26	20	0	B	66	71
2018	9	12	15	59	37.45	2	42.73617	141.91583	10	0.1	0.12	360	30	-149	40	34	20	23	D	37	63
2018	9	12	17	43	29	2	42.703	141.97467	32.8	0.24	0.22	165	85	-112	29	38	19	18	C	59	67
2018	9	12	18	24	51.88	4.9	42.66467	141.98767	32.31	0.21	0.15	9	52	140	13	10	60	15	B	100	59
2018	9	12	18	31	43.34	2.4	42.67333	141.98466	31.11	0.22	0.18	303	9	116	29	17	32	13	A	89	70
2018	9	12	19	11	7.7	2.1	42.63833	141.99867	36.02	0.25	0.23	311	61	151	43	41	18	29	D	47	63
2018	9	12	21	40	20.81	2.8	42.60233	141.98517	36.43	0.25	0.21	281	51	45	25	13	44	13	A	92	64
2018	9	12	23	47	28.67	1.9	42.69333	141.98233	34.55	0.23	0.22	358	23	-73	33	23	26	13	B	76	68
2018	9	13	0	23	28.14	2.4	42.80717	142.0105	33.68	0.2	0.18	38	25	99	42	36	24	31	D	50	66
2018	9	13	1	34	-0.43	4.9	42.60133	141.9565	31.64	0.21	0.14	186	89	143	25	25	41	13	C	56	63
2018	9	13	3	17	46.66	2.9	42.72733	141.98833	34.89	0.2	0.19	94	21	12	22	13	38	14	A	93	65
2018	9	13	3	25	3.99	2.1	42.76783	142.00517	34.21	0.22	0.21	253	66	94	37	41	18	18	D	45	68
2018	9	13	4	17	18.51	2.3	42.6715	141.99066	33.15	0.21	0.17	15	25	82	37	29	24	13	B	62	71
2018	9	13	4	56	4.53	3	42.63667	141.9935	35.78	0.23	0.2	32	88	150	22	19	39	12	A	87	72
2018	9	13	5	12	47.17	4.2	42.72417	142.01883	31.55	0.19	0.15	179	12	97	24	16	49	19	B	91	57
2018	9	13	5	53	50.18	2.9	42.7445	141.97183	31.22	0.18	0.15	249	21	165	36	28	36	12	B	69	61
2018	9	13	7	41	32.95	2.2	42.77567	141.99466	34.81	0.23	0.22	358	83	98	26	42	20	15	D	48	68
2018	9	13	10	59	-0.82	2.4	42.80983	141.9855	34.09	0.22	0.2	5	73	112	29	41	20	20	C	62	69
2018	9	13	12	25	12.13	2.5	42.665	142.00133	40.69	0.27	0.27	105	5	12	42	29	20	17	C	51	66
2018	9	13	14	23	12.57	3.1	42.67967	141.985	34.62	0.21	0.17	34	88	134	17	10	42	8	A	99	65
2018	9	13	15	6	29.05	4.5	42.6915	141.98801	33.95	0.2	0.16	237	29	145	16	12	66	9	A	100	60
2018	9	13	15	18	27.07	2.4	42.782	142.03416	37.16	0.23	0.23	34	70	-112	29	44	15	14	D	47	63
2018	9	13	15	20	-2.1	2.4	42.766	142.0295	31.74	0.2	0.18	178	7	106	39	21	24	15	B	63	67
2018	9	13	20	9	46.39	1.7	42.73183	141.89799	15.17	0.12	0.14	10	39	120	41	37	21	25	D	45	62
2018	9	13	20	21	26.26	1.7	42.82933	142.097	12.27	0.12	0.15	53	74	-105	46	47	15	30	D	29	67
2018	9	13	21	17	45.48	2	42.83217	142.0945	13.35	0.11	0.13	265	27	-89	35	40	26	19	D	45	60
2018	9	13	21	42	22.66	1.9	42.66483	141.99567	35.99	0.26	0.25	334	25	106	42	29	17	15	D	48	67
2018	9	13	22	20	-1.9	2.1	42.695	142.00233	32.78	0.21	0.19	314	22	85	36	25	25	12	B	69	67
2018	9	13	22	46	-1.97	2.3	42.72083	142.02383	31.97	0.19	0.17	351	62	85	33	42	30	20	C	58	65
2018	9	14	0	44	56.77	1.4	42.72533	141.9245	15.45	0.12	0.16	162	75	-172	32	29	11	8	B	77	63
2018	9	14	0	59	22.1	2.6	42.638	141.99483	38.56	0.25	0.23	68	18	97	39	26	38	7	C	56	73
2018	9	14	1	53	22.81	2.4	42.60167	141.98517	36.26	0.25	0.23	114	60	120	21	34	27	10	B	79	64
2018	9	14	2	8	1.55	2.5	42.66183	141.98849	32.93	0.2	0.16	316	30	46	29	15	37	12	A	91	67
2018	9	14	2	19	28.38	2.3	42.61833	141.99516	36.28	0.24	0.22	354	75	88	17	35	31	12	B	76	62
2018	9	14	3	36	19.09	2.2	42.68383	141.98033	31.32	0.19	0.16	30	9	-57	34	20	31	9	B	74	60
2018	9	14	6	52	52.54	1.6	42.668	141.89616	14.89	0.18	0.19	227	70	-117	42	42	14	37	D	45	63
2018	9	14	6	54	21.56	5.2	42.6655	141.95717	28.96	0.18	0.14	188	88	-124	13	13	66	17	B	100	60
2018	9	14	7	43	1.46	2.3	42.71067	141.99083	33.12	0.22	0.21	128	14	54	44	26	20	19	C	59	69
2018	9	14	7	44	3.44	2.3	42.65967	141.95799	27.92	0.19	0.2	19	77	139	16	17	29	15	A	100	68
2018	9	14	8	8	1.77	3.1	42.595	141.9465	27.77	0.19	0.14	198	83	-169	11	9	52	9	A	100	68
2018	9	14	9	48	31.82	4.9	42.809	141.991	34.1	0.19	0.17	71	14	5	18	10	61	10	A	100	63
2018	9	14	10	5	34.41	2.1	42.64267	142.01016	39.48	0.29	0.29	141	49	101	44	43	10	15	D	37	64
2018	9	14	11	40	6.26	2.1	42.75667	142.00166	34.33	0.22	0.21	242	4	166	43	41	18	19	D	41	71
2018	9	14	13	53	53.45	1.8	42.76083	142.026	32.87	0.24	0.25	329	80	123	45	50	10	29	D	31	68
2018	9	14	14	49	-2.72	2.5	42.70433	141.98151	33.34	0.2	0.17	198	76	-168	13	16	29	19	B	100	73
2018	9	14	14	53	33.53	1.9	42.74783	141.87933	12.7	0.11	0.13	158	82	85	28	39	12	20	B	66	66
2018	9	14	15	43	35.69	2.3	42.6445	141.99651	33.41	0.22	0.18	198	43	35	25	24	19	7	A	85	61
2018	9	14	17	3	7.93	3	42.70317	141.98134	32.84	0.19	0.16	232	1	134	24	11	49	12	A	96	66
2018	9	14	17	31	41.42	4.7	42.604	141.97467	38.59	0.24	0.22	201	36	71	18	14	67	14	A	100	58
2018	9	14	17	37	34.31	2	42.71416	141.81517	24.95	0.18	0.17	299	19	-128	37	27	20	14	B	62	67
2018	9	14	19	39	47.66	2.2	42.81933	142.005	32.48	0.2	0.19	329	88	110	26	35	31	24	C	72	61
2018	9	14	21	3	11.22	2.4	42.73167	141.9865	32.71	0.19	0.15	247	51	144	18	13	40	21	C	100	64
2018	9	14	21	22	17.01	2	42.75683	142.0135	35.82	0.23	0.23	178	53	107	23	24	23	6	A	91	59
2018	9	14	21	51	-4.95	1.8	42.68267	141.98584	33.65	0.24	0.23	116	23	34	42	35	16	25	D	46	66
2018	9	14	22	20	15.28	2.4	42.65767	141.98967	34.69	0.22	0.19	170	4	97	23	12	44	8	A	96	67
2018	9	14	23	7	10.18	2	42.77567	141.94901	18.69	0.12	0.14	218	80	-162	12	9	34	15	B	100	59
2018	9	14	23	9	27.61	1.7	42.741	141.91133	10.98	0.1	0.12	53	17	152	39	35	21	34	D	51	59
2018	9	14	23	11	5.46	2.1	42.65683	141.987	38.71	0.25	0.26	144	67	137	17	32	34	9	A	81	71
2018	9	14	23	38	-3.42	2	42.6845	141.974	35.89	0.23	0.24	45	23	27	35	16	31	17	B	76	76
2018	9	15	0	36	-0.17	1.4	42.77533	141.91167	7.21	0.09	0.12	190	54	171	40	41	12	16	D	43	63
2018	9	15	0	39	6.37	2.9	42.68717	141.989	33.78	0.2	0.16	128	29	136	18	17	44	14	A	100	67
2018	9	15	0	54	49.51	2	42.79533	142.01184	33.74	0.2	0.19	228	31	147	38	21	23	3	B	69	64
2018	9	15	1	21	23.72	2	42.6135	141.96083	28.42	0.2	0.16	17	70	135	48	45	25	10	D	62	60
2018	9	15	2	14	34.3	2.8	42.73317	141.99434	33.75	0.19	0.16	218	48	146	16	9	45	11	A	100	59
2018	9	15	2	21	9.06	2.6	42.67083	142.0105	35.92	0.22	0.21	241	32	147	23	10	45	5	A	98	65
2018	9	15	3	6	11.27	3	42.74917	141.99234	34.33	0.2	0.17	267	23	-162	25	16	44	7	A	91	62
2018	9	15	3	48	46.53	2.7	42.73483	141.89101	15.54	0.11	0.11	20	71	153	15	18	48	17	B	100	58
2018	9	15	3	53	35.29	1.5	42.78483	141.95616	17.99	0.13	0.16	214	69	175	26	22	21	25	C	85	62
2018	9	15	3	57	10.41	2.1	42.66516	141.95816	28.49	0.18	0.16	6	77	155	21	25	31	12	A	82	70
2018	9	15	4	15	18.61	3.1	42.674	141.9895	33.56	0.2	0.16	186	38	76	13	11	60	10	A	100	62
2018	9	15	4	27	51.48	3.2	42.74	141.90933	13.43	0.1	0.11	204	83	100	31	34	50	49	D	64	52
2018	9	15	4	32	8.28	1.1	42.738	141.92033	9.53	0.11	0.14	306	82	-103	43	50	11	29	D	37	66
2018	9	15	4	41	0.48	2.1	42.741	141.90784	12.09	0.1	0.11	37	64	-178	46	46	21	23	D	36	54
2018	9	15	5	22	49.95	2	42.78467	141.91267	11.7	0.1	0.11	227	78	-158	31	33	32	23	C	74	58
2018	9	15	5	23	24.79	2.5	42.61367	141.98216	35.31	0.23	0.2	20	70	121	14	12	38	14	A	100	63
2018	9	15	5	28	41.27	1.7	42.73983	141.91267	11.26	0.1	0.12	313	85	-134	51	54	14	28	D	36	56
2018	9	15	5	51	47.44	2.5	42.73167	141.88333	17.23	0.12	0.12	32	66	137	12	12	38	16	B	100	59
2018	9	15	5	59	26.76	2.3	42.76317	141.995	33.79	0.21	0.19	101	12	22	36	18	27	9	B	75	63
2018	9	15	6	10	51.7	1.5	42.72933	141.89999	13.61	0.14	0.15	84	81	107	37	44	11	8	D	49	63
2018	9	15	6	16	43.4	1.8	42.7365	141.89534	14.27	0.12	0.13	23	44	126	33	33	23	15	B	65	57
2018	9	15	6	32	49.16	2.7	42.73183	141.98984	33.3	0.19	0.16	332	36	76	30	15	35	15	B	76	62
2018	9	15	7	23	22.82	2.5	42.82433	141.99617	32.66	0.19	0.17	308	5	-131	32	16	38	18	B	88	64
2018	9	15	7	49	19.11	2.5	42.733	141.8925	15.38	0.11	0.12	3	47	112	30	29	35	23	C	71	63
2018	9	15	7	52	29.41	2.1	42.6675	141.9875	39.51	0.26	0.27	129	56	118	36	44	17	13	D	40	68
2018	9	15	8	56	7.5	2	42.7345	141.89133	15.16	0.12	0.13	17	71	165	38	43	20	27	C	60	60
2018	9	15	9	24	53.41	2.2	42.67017	141.99783	32.39	0.22	0.18	131	74	92	32	36	23	21	C	68	68
2018	9	15	9	35	-2.96	2	42.6615	141.99716	40.67	0.29	0.3	217	60	108	46	48	13	33	D	36	65
2018	9	15	10	55	44.1	3.2	42.61583	141.96851	30.7	0.2	0.14	2	87	168	32	30	47	10	B	71	69
2018	9	15	11	45	39.47	1.7	42.72617	141.89549	15.04	0.14	0.16	198	42	102	47	50	15	36	D	28	61
2018	9	15	14	1	33.43	1.8	42.74017	141.90916	10.65	0.11	0.13	340	80	-144	44	44	13	24	D	44	55
2018	9	15	14	3	-0.1	3.6	42.73067	141.97734	32.88	0.19	0.15	204	38	148	14	9	47	14	A	100	65
2018	9	15	15	27	47.86	3	42.66033	141.89717	16.23	0.13	0.12	29	48	142	12	13	41	17	B	100	64
2018	9	15	16	34	30.41	2.5	42.68817	141.97133	33.87	0.2	0.17	157	80	-169	9	9	28	7	A	100	62
2018	9	15	17	20	-0.8	3.3	42.69067	141.97884	33.89	0.2	0.16	340	86	173	8	9	53	11	A	100	66
2018	9	15	18	23	53.38	3.6	42.6805	141.98117	34.15	0.21	0.16	229	34	180	18	11	52	13	A	99	65
2018	9	15	18	53	-0.13	1.9	42.73283	141.89583	14.55	0.11	0.13	22	68	176	34	28	28	19	B	69	59
2018	9	15	19	38	-5.4	4.4	42.62283	141.98917	38.6	0.24	0.22	193	68	-164	8	8	66	7	A	100	58
2018	9	15	19	46	9.73	2.1	42.73734	141.896	14.2	0.11	0.12	14	71	151	22	25	36	14	A	90	62
2018	9	15	20	20	8.21	2.5	42.6425	141.99266	32.24	0.2	0.15	109	34	10	16	20	47	17	B	99	61
2018	9	15	20	33	47.56	1.8	42.66367	141.90199	14.54	0.13	0.13	28	56	155	10	11	28	9	A	100	64
2018	9	15	20	42	13.24	1.9	42.6615	141.89816	14.82	0.13	0.12	172	73	108	32	42	32	28	C	55	53
2018	9	15	20	59	33.83	2.4	42.662	141.9875	36.32	0.23	0.22	309	34	-106	21	10	39	7	A	100	68
2018	9	15	21	21	34.44	2.5	42.72066	141.9485	36.22	0.21	0.21	95	19	30	28	13	39	10	A	92	66
2018	9	15	22	24	5.02	1.8	42.66483	141.9765	31.07	0.22	0.2	37	8	-53	37	24	19	12	B	70	68
2018	9	15	23	54	46.19	3.2	42.65883	141.98866	32.55	0.2	0.15	17	89	-133	16	23	52	13	A	98	65
2018	9	16	0	5	17.34	1.5	42.73217	141.9015	9.9	0.11	0.15	24	45	156	34	35	15	10	D	49	59
2018	9	16	0	28	-3	1.7	42.69717	141.93417	34.76	0.25	0.25	294	90	98	30	40	18	16	C	54	72
2018	9	16	2	13	35.84	2.2	42.72766	141.98917	32.99	0.21	0.18	242	41	-169	31	26	31	14	B	76	65
2018	9	16	3	20	41.97	2.1	42.6595	142.00116	32.32	0.21	0.18	148	26	43	38	16	28	12	B	75	69
2018	9	16	4	34	38.75	2.6	42.6995	141.981	32.06	0.2	0.17	160	14	64	29	12	39	10	A	89	66
2018	9	16	4	44	14.11	2.4	42.7415	141.97667	33.88	0.21	0.18	295	79	98	18	37	29	8	B	71	68
2018	9	16	5	30	5.92	2.1	42.81917	142.01117	31.23	0.19	0.18	63	27	158	35	21	25	10	B	73	66
2018	9	16	7	2	35.85	2.9	42.68017	141.9825	32.84	0.2	0.16	314	90	-173	18	21	39	12	A	86	67
2018	9	16	7	41	-0.76	2.5	42.69933	141.99083	32.24	0.2	0.18	160	14	63	25	13	31	3	A	95	70
2018	9	16	7	47	45	3.4	42.8085	142.00366	32.39	0.18	0.16	176	80	-89	16	29	52	12	A	86	63
2018	9	16	9	37	53.95	2	42.77917	142.03133	35.8	0.23	0.23	287	81	105	30	45	19	19	C	51	70
2018	9	16	10	55	54.29	2.9	42.68483	141.96567	29.53	0.19	0.16	161	81	-163	12	13	29	25	C	100	64
2018	9	16	12	9	29.3	2.7	42.68017	141.97	36.32	0.23	0.22	193	35	-154	31	25	23	4	B	78	70
2018	9	16	14	4	2.86	2.6	42.63683	142.00101	35.23	0.24	0.22	19	30	154	39	22	20	23	C	68	64
2018	9	16	17	5	42.94	2.2	42.62967	142.00717	36.53	0.26	0.25	316	37	120	33	21	22	7	B	78	65
2018	9	16	17	37	23.75	1.7	42.67517	141.99017	33.39	0.26	0.26	177	70	85	41	45	11	23	D	31	57
2018	9	16	23	51	13.93	3.8	42.6815	141.98383	32.97	0.19	0.15	259	29	127	23	13	61	10	A	99	65
2018	9	17	0	36	35.53	2.2	42.72066	141.98801	33.15	0.2	0.17	48	77	157	12	9	37	5	A	100	64
2018	9	17	1	13	18.11	1.8	42.69083	141.974	32.06	0.22	0.24	348	30	116	35	21	27	3	B	77	66
2018	9	17	1	15	4.14	2.5	42.66333	141.98033	38.06	0.24	0.23	241	26	175	31	15	39	10	A	83	68
2018	9	17	1	30	-2.5	1.6	42.636	141.96117	31	0.26	0.27	83	79	-115	36	47	17	23	D	45	75
2018	9	17	2	9	52.54	3.7	42.68683	141.99966	33.74	0.2	0.16	251	22	125	23	18	61	18	B	94	63
2018	9	17	2	42	35.77	1.7	42.66267	142.01683	37.03	0.28	0.29	136	72	98	29	38	21	12	C	57	64
2018	9	17	2	51	30.97	5.3	42.71817	141.86684	29.82	0.18	0.14	192	85	-127	13	11	68	12	A	100	61
2018	9	17	4	7	37.18	3.5	42.81667	142.00034	32.85	0.18	0.15	225	20	143	25	19	57	13	A	88	62
2018	9	17	4	30	-3.98	2.4	42.81767	142.0025	31.89	0.18	0.16	72	19	-2	27	11	39	6	A	89	63
2018	9	17	4	57	50.05	1.7	42.721	141.86766	28.66	0.2	0.19	186	29	112	31	29	23	15	B	73	64
2018	9	17	7	36	41.66	2.2	42.82017	142.00534	32.22	0.2	0.2	349	88	129	15	34	30	17	B	81	62
2018	9	17	9	40	13.34	2	42.81	142.02266	32.98	0.27	0.3	236	76	-76	43	40	16	21	D	40	64
2018	9	17	10	41	-3.54	2.1	42.817	142.01767	32.75	0.24	0.26	309	69	108	40	42	13	9	D	42	52
2018	9	17	11	21	6.38	2.5	42.7045	141.98833	32.7	0.21	0.19	153	48	98	42	42	17	11	D	43	58
2018	9	17	13	6	18.61	3.5	42.71167	141.98584	32.14	0.19	0.16	132	25	154	22	14	44	12	A	94	70
2018	9	17	14	4	51.39	2.5	42.68616	141.98033	33.44	0.22	0.19	307	19	23	36	16	32	16	B	69	70
2018	9	17	15	11	13.86	3.3	42.72617	141.978	31.08	0.19	0.16	17	34	125	18	11	41	10	A	98	62
2018	9	17	16	3	35.5	2.8	42.8225	141.99533	31.59	0.19	0.18	258	18	178	29	13	32	6	A	86	66
2018	9	17	17	46	42.27	2.3	42.726	141.9895	35.98	0.21	0.22	200	89	-124	28	33	20	14	B	73	64
2018	9	17	21	27	18.96	3	42.78683	141.98083	33.61	0.19	0.16	270	24	-160	27	21	45	17	B	86	63
2018	9	17	21	49	42.7	3.2	42.61817	141.98083	39.05	0.25	0.22	185	86	-156	9	11	42	14	A	100	62
2018	9	17	23	1	38.76	2.3	42.70284	141.96716	36.58	0.23	0.23	283	27	165	32	13	42	9	A	85	63
2018	9	18	0	42	27.38	3.4	42.73233	141.99266	32.89	0.2	0.16	209	82	159	12	9	44	9	A	100	66
2018	9	18	3	16	41.54	2	42.64083	141.98967	32.4	0.24	0.23	281	50	-128	43	41	18	12	D	35	72
2018	9	18	4	8	46.51	3.3	42.65067	141.98567	31.37	0.2	0.16	159	63	106	16	28	40	12	A	92	64
2018	9	18	5	40	17.09	4.3	42.822	141.99316	32.77	0.19	0.16	351	85	101	13	24	51	10	A	97	65
2018	9	18	6	36	49.48	2.2	42.75117	142.02716	33.94	0.23	0.21	352	67	74	31	40	17	10	C	52	64
2018	9	18	6	42	40.79	3.9	42.788	142.01817	32.31	0.19	0.16	68	24	2	19	11	46	10	A	99	64
2018	9	18	8	28	47.61	2.2	42.70583	141.98816	33.9	0.24	0.23	177	61	62	30	37	18	20	B	61	64
2018	9	18	8	51	28.43	1.9	42.83233	141.91066	4.61	0.09	0.21	195	56	124	38	42	17	28	D	50	49
2018	9	18	12	38	12.46	2.8	42.67033	141.98784	33.91	0.22	0.19	207	44	161	30	17	32	15	A	82	67
2018	9	18	18	26	20.31	2.5	42.71267	141.98117	33.55	0.21	0.18	54	78	153	35	42	27	31	D	58	64
2018	9	18	19	10	45.79	3	42.7485	142.05516	31	0.19	0.16	335	41	169	30	19	35	15	A	85	64
2018	9	18	21	10	17.3	2.7	42.817	142.00101	32	0.19	0.17	185	14	135	33	18	36	9	B	78	67
2018	9	18	21	57	48.34	2	42.6565	142.00101	37.02	0.25	0.24	188	89	-152	48	52	13	34	D	33	68
2018	9	18	22	14	29.93	1.7	42.679	141.983	34.09	0.26	0.26	303	29	-119	44	46	13	13	D	30	58
2018	9	18	23	57	45.67	2.1	42.69217	141.96967	33.45	0.2	0.18	113	79	-110	31	40	23	18	C	67	70
2018	9	19	6	30	49.95	2.1	42.81917	142.00233	32.59	0.22	0.21	292	71	81	31	47	16	6	D	46	62
2018	9	19	9	42	41.33	3	42.6725	141.96666	28.71	0.19	0.17	176	74	-150	31	35	35	13	C	57	63
2018	9	19	15	21	46.24	4.3	42.78567	141.99884	34.2	0.19	0.17	239	26	154	16	12	57	9	A	100	59
2018	9	19	19	58	21.65	3	42.64233	142.00084	38.12	0.24	0.23	355	81	90	13	33	33	10	A	84	68
2018	9	19	20	23	53.51	1.4	42.7295	141.9135	5.97	0.12	0.17	59	32	-155	40	43	10	13	D	40	68
2018	9	19	20	43	46.82	2.9	42.76617	141.99583	31.94	0.19	0.16	243	31	148	15	10	45	13	A	99	64
2018	9	19	22	27	-0.2	1.8	42.66383	141.98399	32.05	0.22	0.21	195	82	-156	38	38	14	17	C	60	74
2018	9	20	0	14	48.18	1.6	42.65166	141.89484	13.89	0.15	0.17	110	71	113	33	40	12	0	C	57	61
2018	9	20	1	54	32.69	2.7	42.67417	141.96716	28.6	0.19	0.18	220	82	-141	22	19	43	11	A	84	64
2018	9	20	4	26	47.78	2.3	42.72533	141.98734	32.6	0.2	0.17	191	86	-120	23	25	34	16	B	84	66
2018	9	20	6	16	12.71	1.8	42.65617	141.95583	27.49	0.21	0.23	179	43	108	45	49	13	25	D	36	68
2018	9	20	7	45	20.98	2.2	42.66383	141.98816	33.07	0.22	0.2	327	14	156	36	26	21	5	B	67	75
2018	9	20	20	47	11.22	1.8	42.645	141.9015	14.89	0.15	0.17	331	34	-119	36	33	16	23	C	56	63
2018	9	20	22	41	19.94	1.3	42.79967	141.93117	12.58	0.14	0.21	9	43	142	45	41	13	29	D	41	56
2018	9	20	23	38	-3.01	1.8	42.78117	142.01767	33.32	0.22	0.24	235	12	-172	37	25	28	11	B	69	63
2018	9	21	0	15	23.46	3.4	42.67667	141.96651	30.21	0.18	0.14	25	77	161	10	8	57	14	A	100	66
2018	9	21	0	43	-3.71	1.8	42.818	142.00233	31.4	0.21	0.2	109	25	90	32	20	25	12	B	77	65
2018	9	21	1	21	30.13	1	42.74333	141.92934	5.61	0.09	0.13	167	79	-123	36	33	15	24	C	58	54
2018	9	21	1	38	21.1	1.8	42.68483	141.99483	33.78	0.22	0.21	328	8	-126	42	27	23	15	C	54	67
2018	9	21	1	40	28.72	1.8	42.7405	142.00166	32.85	0.2	0.19	245	40	161	43	18	35	15	B	63	61
2018	9	21	1	49	49.34	1.1	42.68283	141.892	12.68	0.14	0.17	154	70	119	49	50	10	10	D	27	68
2018	9	21	3	25	16.4	1.9	42.6565	142.00084	32	0.22	0.2	340	90	-108	24	40	20	24	C	57	70
2018	9	21	6	7	5.11	2.3	42.6985	141.98117	33.03	0.22	0.19	19	61	102	22	26	27	9	A	86	67
2018	9	21	6	54	35.45	2.7	42.6425	141.99117	34.32	0.22	0.18	139	29	32	32	22	28	11	B	78	57
2018	9	21	7	56	8.32	4.6	42.6295	141.99133	35.37	0.23	0.2	2	17	175	38	37	57	12	D	46	60
2018	9	21	15	7	5.59	1.5	42.67817	141.88617	11.45	0.18	0.2	153	54	108	39	47	10	12	D	35	65
2018	9	21	15	14	35.2	2.7	42.6965	141.97284	32.9	0.23	0.19	62	24	-50	27	23	25	12	B	89	64
2018	9	21	16	48	53.86	3.6	42.675	141.99049	33.08	0.2	0.16	226	28	137	20	15	56	11	A	99	63
2018	9	21	17	26	35.42	3.1	42.67484	141.99117	33.08	0.21	0.16	181	40	110	17	21	44	11	A	97	67
2018	9	21	17	40	9.05	2.3	42.65033	142.00967	33.02	0.22	0.19	360	58	142	35	21	23	19	B	80	72
2018	9	21	18	30	21.03	1.6	42.654	142.008	37.54	0.29	0.29	185	33	95	44	45	13	27	D	32	69
2018	9	21	18	47	2.95	2.9	42.6125	141.97934	28.61	0.2	0.16	21	89	157	13	11	36	19	B	100	66
2018	9	21	18	46	36.5	2.5	42.66283	141.98283	30.98	0.2	0.16	53	75	148	38	41	45	29	D	43	64
2018	9	21	20	37	50.29	2.3	42.6665	141.98717	31.81	0.21	0.17	139	24	33	29	20	32	14	B	76	62
2018	9	21	22	46	36.79	1.7	42.66333	141.9985	34.26	0.25	0.26	152	52	102	32	42	12	28	D	47	66
2018	9	21	23	12	-0.94	1.5	42.79867	141.93016	12.83	0.12	0.17	194	83	173	19	22	17	10	A	94	64
2018	9	22	0	53	12.9	1.9	42.72033	141.97684	32.18	0.21	0.2	289	80	106	27	39	20	7	B	63	68
2018	9	22	1	13	4.29	3.2	42.62883	141.978	31.05	0.2	0.14	52	76	140	11	9	64	19	B	100	66
2018	9	22	2	2	4.37	2.2	42.68517	141.9875	34.38	0.21	0.19	139	52	94	29	31	27	8	B	76	62
2018	9	22	3	35	37.66	3	42.68333	141.98883	38.07	0.23	0.22	213	28	143	26	11	44	9	A	89	63
2018	9	22	5	10	23.46	3	42.79917	141.98033	34.1	0.19	0.17	267	14	-172	24	10	45	10	A	95	65
2018	9	22	6	30	45.65	1.8	42.79383	141.92867	16.01	0.14	0.17	25	55	145	30	31	17	13	B	74	62
2018	9	22	7	3	10.9	3.3	42.73433	141.99916	33.52	0.19	0.16	8	30	96	22	14	50	11	A	97	62
2018	9	22	7	3	40.58	3.2	42.62617	141.99966	36.65	0.27	0.28	349	35	118	41	30	25	32	D	57	74
2018	9	22	10	39	8.38	1.8	42.791	141.9305	15.59	0.14	0.21	31	52	150	42	40	16	27	C	54	68
2018	9	22	10	43	47.07	1.8	42.79267	141.93184	15.01	0.15	0.21	9	83	148	38	41	10	0	C	55	62
2018	9	22	11	1	-2.5	2.3	42.68833	141.9745	34.03	0.22	0.19	176	77	-53	26	32	23	17	B	78	63
2018	9	22	11	27	5.15	2.7	42.667	141.9445	27.41	0.17	0.15	335	42	8	28	21	31	14	A	90	74
2018	9	22	12	10	47.29	1.7	42.79117	141.9265	14.58	0.13	0.17	6	85	152	29	31	17	19	B	70	63
2018	9	22	12	46	25.88	1.6	42.79633	141.93317	13.96	0.13	0.19	203	39	143	41	31	12	21	C	56	75
2018	9	22	12	54	40.62	2	42.82033	142.01233	31	0.19	0.17	8	86	129	25	33	23	18	B	72	69
2018	9	22	14	33	5.58	2.5	42.65283	142.00333	41.27	0.27	0.29	225	28	122	36	25	22	11	B	64	67
2018	9	22	23	20	27.02	2.8	42.79317	142.01733	33.17	0.18	0.16	261	10	175	31	13	41	11	A	86	63
2018	9	23	1	41	51.2	2.3	42.62217	141.99634	35.38	0.24	0.22	159	55	134	35	37	26	30	D	57	67
2018	9	23	1	55	52.97	2.3	42.74417	141.9785	31.46	0.19	0.17	183	16	108	33	19	27	9	B	75	61
2018	9	23	2	1	12.2	1.9	42.777	141.95567	16.67	0.12	0.15	165	11	61	37	22	21	16	B	65	63
2018	9	23	4	41	4.09	2	42.76883	141.99733	33.57	0.2	0.18	64	40	18	29	23	22	17	B	87	73
2018	9	23	5	0	36.53	2	42.69584	141.97966	33.73	0.22	0.2	330	86	84	31	38	20	18	B	63	72
2018	9	23	9	28	39.25	2.2	42.692	141.97966	33.21	0.2	0.18	306	76	116	27	35	26	29	C	70	69
2018	9	23	9	41	33.24	2.2	42.78833	141.99899	35.77	0.22	0.24	59	11	-27	39	22	27	8	B	66	58
2018	9	23	10	17	0.45	3.1	42.77317	142.0265	36.28	0.2	0.2	163	28	42	27	14	41	11	A	93	63
2018	9	23	10	19	37.7	2.1	42.7325	141.98483	32.59	0.2	0.19	230	66	119	32	41	17	23	C	54	64
2018	9	23	10	41	26.8	2.8	42.799	142.01866	32.52	0.19	0.16	145	20	55	22	13	46	15	B	98	65
2018	9	23	11	46	26.25	2.3	42.68233	141.95633	27.74	0.18	0.17	345	44	126	35	21	21	7	B	74	69
2018	9	23	13	13	16.4	2.7	42.82333	142.01317	31.83	0.18	0.15	142	33	123	29	26	36	19	B	77	63
2018	9	23	14	13	28.93	2.3	42.673	141.96716	30.37	0.19	0.16	321	30	82	34	22	25	4	B	80	71
2018	9	23	14	40	42.66	2.3	42.66617	141.99033	38.13	0.24	0.24	89	90	-80	33	41	20	16	C	62	64
2018	9	23	16	27	31.44	1.7	42.69883	141.97617	35.3	0.25	0.25	359	22	-75	43	39	13	19	D	39	57
2018	9	23	22	47	28.84	1.9	42.68867	141.97433	33.78	0.21	0.19	239	24	154	31	20	23	16	B	80	65
2018	9	24	0	7	38.31	1.9	42.756	141.91684	3.36	0.08	0.13	358	88	-147	41	48	14	42	D	37	59
2018	9	24	0	7	38.29	1.9	42.758	141.91484	3.92	0.08	0.12	10	73	-105	35	34	16	28	C	70	63
2018	9	24	0	54	8.03	1.9	42.72483	141.98734	33.55	0.22	0.21	193	54	105	26	33	26	11	B	71	66
2018	9	24	2	53	5.4	2.8	42.73033	141.98117	35.23	0.2	0.19	202	37	176	15	8	46	7	A	100	61
2018	9	24	3	28	-0.29	1.6	42.725	141.98734	33.86	0.23	0.22	282	40	-140	42	40	15	14	D	45	60
2018	9	24	4	24	37.76	2.2	42.61333	141.99733	33.95	0.22	0.18	16	57	127	40	38	19	9	C	61	61
2018	9	24	4	36	43.02	1.7	42.71	141.9825	32.98	0.21	0.19	269	32	-170	44	29	21	15	D	49	65
2018	9	24	6	0	40.7	3.3	42.7345	141.89233	15.7	0.11	0.11	38	68	165	16	20	41	16	B	94	56
2018	9	24	8	50	12.25	1.9	42.737	141.89717	13.75	0.12	0.13	67	64	115	38	45	20	17	D	44	55
2018	9	24	18	17	5.46	5	42.626	141.99817	41.09	0.25	0.23	213	19	116	21	15	72	11	A	98	63
2018	9	24	18	49	32.16	2.3	42.75917	142.004	34.44	0.21	0.2	349	88	107	19	30	36	9	B	80	62
2018	9	24	19	1	46.42	2	42.68333	141.9865	31.52	0.2	0.18	101	66	93	27	43	23	22	C	58	67
2018	9	24	19	40	28.87	2.9	42.6415	141.99817	34.75	0.21	0.18	74	28	-46	21	20	32	15	B	94	67
2018	9	24	21	45	29.07	2.2	42.67417	141.96733	28.76	0.18	0.15	129	75	-119	28	39	27	19	C	60	64
2018	9	24	22	41	41.84	3.1	42.64917	141.99066	36.15	0.22	0.2	110	20	-18	21	20	38	16	B	99	65
2018	9	24	23	57	41.98	3.1	42.68467	141.97701	32	0.19	0.14	281	80	126	9	13	49	9	A	100	68
2018	9	25	1	16	1.11	2.8	42.823	141.99516	31.95	0.18	0.16	3	17	125	28	12	41	13	A	96	68
2018	9	25	3	26	34.25	1.4	42.79383	141.92867	12.56	0.13	0.19	16	55	136	39	44	13	14	C	51	64
2018	9	25	4	22	13.36	1.9	42.7235	141.9745	31.17	0.21	0.2	25	73	88	29	42	19	22	D	49	61
2018	9	25	10	24	19.77	1.9	42.76567	141.92166	2.06	0.08	0.19	59	90	87	53	48	16	78	D	40	38
2018	9	25	14	29	57.59	1.5	42.829	141.90067	7.64	0.15	0.23	221	60	129	40	41	11	18	D	45	68
2018	9	25	15	7	48.67	1.9	42.81967	142.00717	32.49	0.23	0.22	332	89	113	29	48	18	18	D	46	63
2018	9	25	17	16	5.48	3.2	42.78983	141.98067	32.88	0.19	0.16	91	29	-2	25	18	44	7	A	87	65
2018	9	25	19	0	5.81	3.9	42.78667	141.97966	34.57	0.2	0.17	253	20	-178	15	10	53	7	A	100	56
2018	9	25	19	7	3.78	3.2	42.67484	141.9765	29.64	0.18	0.16	17	26	97	29	16	50	16	B	82	67
2018	9	25	20	18	24.33	2.5	42.69567	142.00549	32.21	0.2	0.16	25	84	164	33	33	43	17	C	55	67
2018	9	25	21	37	13.93	2	42.64467	141.99167	34.65	0.23	0.21	326	27	-108	36	29	28	17	C	59	72
2018	9	26	0	21	31.32	1.7	42.729	141.97717	32.5	0.21	0.19	10	40	82	32	28	24	11	B	74	65
2018	9	26	1	2	51.97	1.7	42.76333	141.93033	5.05	0.08	0.11	214	61	-179	39	36	22	19	C	53	55
2018	9	26	1	34	2.83	1.6	42.76983	141.95433	17.7	0.13	0.17	150	67	80	30	36	20	9	B	70	69
2018	9	26	4	34	39.23	1	42.7605	141.9265	2.73	0.09	0.16	317	87	104	50	49	9	10	D	30	60
2018	9	26	5	22	43.53	2.4	42.759	142.00867	31.13	0.18	0.15	261	9	-171	33	17	36	3	B	72	65
2018	9	26	8	17	30.45	2.3	42.66033	141.96666	27.91	0.19	0.19	10	57	136	33	22	24	6	B	80	62
2018	9	26	10	28	35.71	2.6	42.81617	142.024	31.94	0.19	0.17	146	32	32	30	19	37	18	B	85	70
2018	9	26	12	34	5.03	2	42.7435	142.01733	33.76	0.24	0.22	110	5	41	33	19	22	15	B	81	63
2018	9	26	12	53	24.82	2.8	42.657	141.95351	28.29	0.18	0.16	38	78	-147	30	31	40	20	C	73	67
2018	9	26	14	40	37.42	3.6	42.66917	141.99066	37.36	0.23	0.21	213	2	-180	32	19	50	16	B	85	63
2018	9	27	2	11	1.86	1.5	42.76733	141.92349	4.43	0.08	0.11	322	78	131	47	44	13	16	D	43	61
2018	9	27	2	39	53.22	2.9	42.7145	142.00917	31.46	0.18	0.14	256	19	-179	23	13	43	5	A	97	62
2018	9	27	2	53	28.9	3.2	42.67817	142.01266	36.07	0.21	0.2	252	35	152	19	13	55	10	A	98	60
2018	9	27	2	57	20.53	1.9	42.83633	142.00383	31.07	0.19	0.17	39	51	111	31	34	20	20	C	74	69
2018	9	27	4	7	45.54	1.9	42.683	141.99867	33.86	0.22	0.22	5	78	106	27	45	28	27	C	56	68
2018	9	27	5	39	-3.75	2.3	42.79383	142.015	33.9	0.2	0.18	19	50	137	15	14	27	12	A	100	65
2018	9	27	7	2	13.43	1.5	42.76683	141.9245	2.97	0.08	0.14	127	45	-115	52	52	13	54	D	30	56
2018	9	27	8	12	43.92	2.2	42.79833	141.99417	34.52	0.24	0.24	160	86	-123	22	37	22	10	B	73	60
2018	9	27	11	5	28.22	2.3	42.74533	141.98	36.4	0.23	0.25	296	81	125	22	38	26	15	B	72	63
2018	9	27	12	11	6.55	3	42.55083	141.991	33.19	0.24	0.17	274	59	131	28	16	33	12	A	90	73
2018	9	27	16	24	53.07	3.3	42.732	141.99316	33.12	0.19	0.15	141	30	131	20	11	46	18	B	99	64
2018	9	27	19	26	3.57	2.5	42.74033	141.98584	34.07	0.2	0.18	63	27	126	16	18	40	12	A	100	59
2018	9	27	20	34	48.03	3	42.67383	141.9785	30.99	0.19	0.14	39	18	0	24	12	40	16	B	95	69
2018	9	27	22	16	5.43	2	42.6815	141.97951	34.46	0.23	0.21	160	85	-113	18	30	27	17	B	83	69
2018	9	28	6	5	2.08	2.7	42.6865	141.89217	13.46	0.11	0.11	62	63	165	26	24	28	18	B	88	56
2018	9	28	8	29	27.03	2.6	42.68817	141.97966	32.85	0.2	0.17	200	75	118	27	37	27	18	B	62	66
2018	9	28	8	52	20.84	1.9	42.68167	141.90016	11.75	0.13	0.14	133	85	117	49	57	8	41	D	31	67
2018	9	28	10	53	3.38	2	42.7195	141.97234	33.93	0.22	0.19	177	48	-163	43	37	11	12	D	49	75
2018	9	28	18	45	12.88	1.5	42.7325	141.90784	9.11	0.1	0.12	325	12	88	60	70	11	38	D	18	63
2018	9	29	0	53	52.78	2.4	42.70267	141.97566	32.28	0.19	0.16	173	82	-114	15	27	32	10	A	89	65
2018	9	29	3	24	6.85	1.2	42.76867	141.92317	3.4	0.08	0.13	230	36	-164	44	47	8	28	D	36	59
2018	9	29	13	1	41.35	2	42.66267	141.99634	33.59	0.23	0.19	297	48	145	54	54	15	33	D	26	55
2018	9	29	18	14	46.87	1.3	42.74567	141.88583	10.43	0.13	0.18	171	73	112	32	40	11	27	C	56	65
2018	9	29	18	25	54.07	5	42.777	142.0015	33.94	0.19	0.16	272	15	-160	13	11	58	8	A	100	58
2018	9	29	20	12	55.15	1.5	42.736	141.89101	12.27	0.11	0.13	186	70	174	34	34	14	6	B	67	66
2018	9	30	7	10	42.33	2.8	42.8145	142.00183	31.99	0.18	0.16	262	10	-169	25	14	44	12	A	98	65
2018	9	30	11	40	33.53	2.9	42.7005	141.979	33.24	0.2	0.16	19	55	142	12	13	40	16	B	100	64
2018	9	30	14	3	55.08	3.3	42.76433	141.99583	33.35	0.19	0.16	189	50	146	13	10	46	11	A	100	63
2018	9	30	14	39	48.65	2.5	42.64483	142.004	32.46	0.21	0.17	35	74	143	36	43	35	22	C	63	65
2018	9	30	17	54	4.15	5.7	42.5405	141.99817	35.42	0.26	0.21	129	36	74	11	18	51	19	B	99	53
2018	9	30	17	58	13.52	3.6	42.55233	141.98633	35.13	0.25	0.2	174	89	-138	5	5	41	3	A	100	68
2018	9	30	18	3	13.65	2.5	42.55583	141.98334	35.19	0.26	0.22	6	88	138	43	41	23	12	D	44	65
2018	9	30	18	35	16.87	2	42.65217	141.99483	32.61	0.22	0.19	158	66	129	31	44	22	19	C	55	65
2018	9	30	18	52	12.5	2.3	42.55817	141.98816	34.97	0.25	0.21	324	11	51	32	25	25	9	B	85	76
2018	9	30	19	50	49.46	2.9	42.555	141.99916	34.38	0.24	0.18	327	37	89	22	16	40	27	C	98	65
2018	9	30	22	40	39.19	2.1	42.66267	142.01666	37.46	0.25	0.26	210	51	117	26	27	25	20	C	82	68
2018	9	30	23	27	1.61	3.4	42.5925	141.96217	34.21	0.23	0.17	307	44	68	19	9	54	8	A	100	64
2018	10	1	1	38	9.88	2.2	42.80117	142.022	32.33	0.19	0.19	320	75	125	34	48	28	22	C	53	62
2018	10	1	1	50	43.22	3.5	42.6795	141.98683	32.86	0.19	0.15	166	68	112	17	27	55	24	C	89	63
2018	10	1	2	8	55.66	2.2	42.64083	141.90717	17.85	0.14	0.13	312	33	74	35	19	30	33	D	72	70
2018	10	1	3	19	4.65	3.3	42.555	142.00534	34.34	0.24	0.18	266	33	98	28	15	55	16	B	85	67
2018	10	1	3	32	42.68	3.6	42.55067	142.00517	34.78	0.24	0.19	182	20	83	20	14	58	16	B	98	65
2018	10	1	3	40	31.54	2.5	42.68817	141.98351	32.61	0.19	0.16	51	20	134	20	18	31	11	A	99	65
2018	10	1	7	47	39.46	3.5	42.5495	141.99683	33.56	0.23	0.16	307	50	118	21	8	44	12	A	99	73
2018	10	1	11	22	3.59	5.5	42.79533	142.01083	32.49	0.18	0.16	93	8	-21	20	19	71	17	B	97	58
2018	10	1	11	31	32.56	2.5	42.79867	142.01767	32.21	0.2	0.19	8	73	107	16	27	32	7	A	91	63
2018	10	1	11	32	46.44	2.6	42.7995	142.0175	33.18	0.21	0.19	173	85	-134	18	19	36	20	B	98	58
2018	10	1	14	43	1.79	3.1	42.58467	141.9565	33.06	0.23	0.17	160	37	53	16	16	35	24	C	100	66
2018	10	1	16	37	9.71	3.9	42.54367	141.9995	34.37	0.25	0.18	310	43	126	23	13	47	10	A	95	71
2018	10	1	17	25	52.78	3.4	42.67667	141.98317	33.99	0.21	0.17	98	16	-5	20	16	48	18	B	98	63
2018	10	1	17	47	37.64	2.2	42.78783	141.84933	13.8	0.12	0.14	324	84	83	21	29	24	20	C	88	69
2018	10	1	20	5	32.66	2.4	42.672	141.98383	33.72	0.23	0.2	11	67	141	28	31	23	14	B	65	63
2018	10	1	23	15	30.6	2.3	42.79583	142.01483	33.9	0.21	0.22	76	16	-2	34	21	30	15	B	73	58
2018	10	1	23	21	39.81	3.8	42.82017	142.01633	31.42	0.18	0.16	170	90	-140	12	15	57	7	A	100	61
2018	10	2	3	40	49.78	2.4	42.67983	141.987	34.13	0.22	0.2	217	85	-98	26	37	28	9	B	66	69
2018	10	2	7	47	21.17	2.2	42.7605	141.94267	18.14	0.13	0.16	25	73	151	41	39	21	23	D	50	55
2018	10	2	14	36	52.22	2.8	42.55017	141.99367	33.2	0.25	0.17	316	74	100	30	35	24	24	C	64	68
2018	10	2	17	5	44.42	2	42.65117	141.9855	39.24	0.29	0.33	162	75	-103	32	45	12	18	C	51	67
2018	10	3	4	40	26.87	2.5	42.668	141.96317	27.46	0.17	0.15	9	85	94	19	28	30	13	A	88	64
2018	10	3	11	6	36.44	2.9	42.65717	142.00084	34.43	0.22	0.18	39	67	127	22	26	28	25	C	87	62
2018	10	3	14	23	34.15	3.6	42.55183	141.992	34.98	0.25	0.2	164	70	-179	9	10	53	6	A	100	66
2018	10	3	18	11	46.07	3.4	42.673	141.98849	32.23	0.19	0.14	229	75	-179	27	25	49	14	B	63	63
2018	10	3	19	56	48.68	2	42.69717	141.9695	31.41	0.21	0.18	146	73	101	30	40	22	31	D	39	69
2018	10	3	20	26	25.31	3.3	42.65033	141.993	35.37	0.22	0.2	346	29	-82	21	14	47	8	A	97	62
2018	10	3	21	4	-1.99	3.8	42.6585	141.99249	32.26	0.19	0.14	5	20	108	14	13	52	7	A	100	64
2018	10	3	22	44	30.77	1.1	42.82917	141.91716	4.84	0.08	0.15	322	2	89	42	48	14	33	D	43	64
2018	10	4	0	38	31.64	1.9	42.66467	142.00383	36.6	0.24	0.24	171	82	-106	41	46	13	35	D	35	61
2018	10	4	0	39	40.79	1.9	42.80583	142.02066	32.3	0.2	0.19	103	40	33	38	28	26	19	B	65	59
2018	10	4	0	44	14.79	1.7	42.8265	141.99867	32.74	0.23	0.23	154	85	-107	20	34	26	17	B	78	66
2018	10	4	0	46	24.22	1.5	42.6565	141.99384	33.53	0.27	0.26	223	56	103	47	47	10	10	D	28	66
2018	10	4	2	32	52.66	2.4	42.552	141.99783	34.49	0.25	0.19	245	35	169	29	21	24	12	B	80	72
2018	10	4	3	38	11.71	2.5	42.66483	141.98666	31.43	0.2	0.15	114	82	101	16	31	29	8	A	82	66
2018	10	4	16	46	30.78	2	42.675	141.99234	34.57	0.26	0.22	32	46	110	41	35	12	11	D	48	53
2018	10	4	18	22	50.31	1.8	42.819	142.0045	32.41	0.21	0.2	349	89	119	26	40	23	16	C	60	65
2018	10	4	21	27	6.33	2.4	42.6635	141.98567	36.85	0.23	0.23	296	31	-124	26	13	32	6	A	95	72
2018	10	5	2	9	32.95	2.5	42.59883	141.95134	30.76	0.22	0.15	354	86	129	35	51	29	34	D	55	65
2018	10	5	4	37	11.6	1.6	42.71833	141.94316	28.7	0.21	0.22	23	85	157	15	19	17	10	A	99	65
2018	10	5	5	24	41.62	2.6	42.67767	141.96834	29.45	0.18	0.15	20	67	142	15	16	41	31	D	100	65
2018	10	5	8	58	48.63	5.7	42.582	141.97501	31.07	0.22	0.15	342	43	76	24	22	70	32	D	88	65
2018	10	5	11	45	41.01	2.7	42.69	141.85417	12.82	0.12	0.12	22	83	130	38	31	26	35	D	57	61
2018	10	5	11	55	17.5	3	42.60467	142.00301	29.02	0.19	0.14	216	65	-176	14	14	37	12	A	99	64
2018	10	5	13	57	12.3	2.9	42.66567	142.10867	7.49	0.09	0.1	91	78	164	37	33	54	32	D	57	47
2018	10	5	20	54	9.83	2.5	42.54967	141.99933	34.3	0.24	0.19	162	68	129	23	39	34	17	C	60	71
2018	10	5	20	57	52.74	1.1	42.74117	142.10367	16.98	0.16	0.25	26	72	154	33	35	14	16	B	68	62
2018	10	5	23	41	0.6	1	42.71433	142.11217	19.67	0.18	0.25	139	82	114	31	41	12	0	C	57	65
2018	10	5	23	54	1.34	3.2	42.6185	141.95734	28.67	0.18	0.14	17	89	147	11	10	53	22	C	100	66
2018	10	6	9	52	24.19	3	42.81867	142.00116	32.42	0.18	0.16	99	34	6	25	21	46	13	A	88	60
2018	10	6	10	10	50.07	2.5	42.6935	141.98367	32.88	0.2	0.17	1	79	180	10	13	30	10	A	100	76
2018	10	6	13	14	23.44	4.8	42.67617	141.9915	34.02	0.2	0.16	187	51	91	20	21	72	16	B	97	58
2018	10	6	13	22	29.75	2	42.671	141.992	34.26	0.24	0.21	5	75	131	18	19	22	15	B	93	67
2018	10	6	13	55	43.12	1.8	42.68217	141.9855	34.8	0.3	0.31	306	33	126	46	44	12	29	D	33	61
2018	10	6	14	1	46.09	2	42.67617	141.97517	30.77	0.22	0.2	207	72	87	31	40	14	8	C	55	60
2018	10	6	22	3	-4.85	2.4	42.67767	141.99133	33.52	0.21	0.18	346	56	80	23	25	39	22	C	88	69
2018	10	6	23	9	16.21	1.9	42.68167	141.84833	11.79	0.12	0.12	278	68	161	33	39	24	18	C	58	65
2018	10	6	23	58	45.8	1.7	42.79633	141.882	26.43	0.17	0.2	356	84	122	30	38	20	28	C	69	71
2018	10	7	0	29	58.76	2	42.6825	141.85533	7.72	0.11	0.15	284	44	126	40	40	28	26	C	52	59
2018	10	7	3	32	32.09	2.6	42.68616	141.853	12.5	0.12	0.12	74	59	155	29	29	42	19	B	80	58
2018	10	7	3	55	50.18	3.4	42.73517	141.99933	34	0.19	0.17	179	15	90	34	24	56	15	B	80	61
2018	10	7	4	54	-3.42	2.1	42.69967	142.00183	33.74	0.21	0.2	263	41	147	39	29	27	29	C	67	61
2018	10	7	5	3	17.83	2.3	42.698	141.98033	33.23	0.2	0.18	346	61	84	17	31	29	20	B	85	71
2018	10	7	5	20	38.94	2.9	42.55283	141.9395	29.14	0.21	0.15	39	81	122	11	12	44	20	B	100	70
2018	10	7	10	57	56.13	2.1	42.685	141.85184	12.12	0.12	0.13	109	29	32	41	30	20	21	C	56	60
2018	10	7	11	58	30.88	2.2	42.6765	141.96483	29.58	0.19	0.17	31	85	152	28	28	26	25	C	76	64
2018	10	7	15	27	21	2.2	42.675	141.90283	17.81	0.14	0.14	47	22	-132	40	41	23	29	D	46	65
2018	10	7	15	51	25.71	2.8	42.80317	142.033	30.88	0.17	0.15	153	44	79	18	14	47	23	C	100	67
2018	10	7	18	42	54.08	2	42.68733	141.99017	32.5	0.22	0.19	162	14	76	32	11	25	4	A	86	72
2018	10	7	22	53	-2.55	3.5	42.5535	141.98567	33.68	0.24	0.17	259	17	147	37	20	53	15	B	71	70
2018	10	8	3	25	22.07	2.7	42.7055	142.00549	34.88	0.21	0.19	350	88	98	19	29	38	15	A	85	66
2018	10	8	5	13	1.98	2.2	42.729	141.98334	32.46	0.22	0.2	86	41	151	39	39	24	10	C	60	66
2018	10	8	21	0	25.93	1.3	42.79333	141.93266	12.76	0.14	0.21	23	39	134	33	32	20	12	B	70	65
2018	10	8	21	10	-1.24	1.5	42.795	141.9295	12.34	0.12	0.18	5	36	115	34	36	18	22	C	61	60
2018	10	8	21	54	-1.27	5	42.61167	141.96967	31.29	0.21	0.15	139	31	20	12	16	79	18	B	100	62
2018	10	8	21	56	14.06	3.1	42.61567	141.97017	30.4	0.2	0.16	111	80	125	28	32	39	31	D	74	66
2018	10	9	2	45	15.9	5	42.61117	141.96033	31.61	0.21	0.15	16	82	147	11	10	70	15	A	100	63
2018	10	9	4	1	-0.73	1.7	42.685	141.90517	7.3	0.11	0.16	358	84	159	43	42	13	23	D	42	67
2018	10	9	8	42	-1.56	3.6	42.58033	141.93916	32.63	0.23	0.16	241	35	112	17	14	43	16	B	100	69
2018	10	9	9	21	28.62	3.7	42.61367	141.95551	31.73	0.21	0.16	196	80	-156	9	9	58	10	A	100	61
2018	10	9	9	43	36.69	2.9	42.72367	141.97533	32.51	0.2	0.17	213	66	140	24	25	30	11	A	87	65
2018	10	9	18	37	43.43	3.1	42.59517	141.96266	32.86	0.22	0.16	333	62	130	31	18	29	20	B	84	60
2018	10	9	20	56	6.43	2.7	42.58083	141.98016	28.91	0.21	0.17	147	20	53	16	11	48	13	A	99	70
2018	10	10	1	0	52.64	2.8	42.6935	141.98016	33.37	0.2	0.15	187	47	-172	28	17	44	14	A	81	70
2018	10	10	17	36	41.72	2	42.81917	142.01517	31.56	0.22	0.23	28	43	155	43	24	23	28	C	61	65
2018	10	10	17	57	4.73	4.1	42.6725	141.978	31.79	0.2	0.15	185	63	169	14	12	53	13	A	100	64
2018	10	10	18	44	52.6	2.2	42.62783	141.98984	39.86	0.28	0.28	333	68	93	39	37	18	19	C	51	77
2018	10	10	21	42	4.29	1.8	42.74483	141.97701	33.36	0.23	0.24	320	76	96	23	35	19	4	B	72	61
2018	10	10	22	40	7.5	3.8	42.6675	141.98151	30.23	0.19	0.15	329	30	158	19	12	53	9	A	99	68
2018	10	11	0	29	11.08	2	42.5995	141.98	30.28	0.21	0.17	305	49	159	51	35	33	28	D	44	69
2018	10	11	3	17	21.59	1.9	42.58633	142.11517	8.41	0.12	0.13	188	83	167	37	40	16	11	D	49	65
2018	10	11	15	8	5.78	2	42.69767	141.98567	35	0.24	0.23	338	63	86	36	37	14	20	C	57	68
2018	10	11	22	46	26.36	3.2	42.66217	142.0015	40.41	0.24	0.23	269	44	20	17	13	52	8	A	100	64
2018	10	12	0	44	26.61	2.5	42.81683	142.01466	31.9	0.18	0.16	95	33	35	33	10	38	11	A	82	65
2018	10	12	1	24	40.69	1	42.68567	142.10384	4.4	0.1	0.12	221	35	-39	46	50	9	25	D	35	45
2018	10	12	9	14	26.89	5.1	42.5615	141.94901	26.48	0.2	0.14	219	31	125	23	13	47	16	B	99	66
2018	10	12	10	42	43.67	3.8	42.7345	141.97816	32.8	0.19	0.15	100	20	19	17	12	53	9	A	100	62
2018	10	12	21	8	53.67	2.1	42.81483	142.00667	32.49	0.2	0.17	172	28	142	40	30	28	34	D	60	69
2018	10	12	23	58	38.77	2.1	42.634	141.99283	34.95	0.23	0.2	275	50	47	29	14	27	8	A	86	74
2018	10	13	1	0	41.43	4.2	42.61617	141.9705	29.57	0.19	0.14	359	76	169	9	11	65	4	A	100	66
2018	10	13	6	8	27.12	2.1	42.7195	141.98351	33.21	0.21	0.2	329	84	94	18	32	23	13	B	80	69
2018	10	13	7	13	20.23	2.7	42.69283	141.97951	31.93	0.19	0.15	224	3	78	30	16	38	15	B	85	66
2018	10	13	15	42	45.38	2.9	42.62517	141.99367	36.17	0.23	0.21	241	35	146	24	12	45	7	A	92	62
2018	10	13	23	52	-2.02	1.5	42.6725	141.99017	33.22	0.25	0.26	200	65	127	42	44	13	29	D	40	59
2018	10	14	0	27	10.88	2.2	42.78633	141.98433	33.72	0.2	0.17	334	30	63	17	11	37	7	A	99	60
2018	10	14	4	47	4.34	3	42.59667	141.95067	28.61	0.19	0.14	40	90	155	9	9	52	10	A	100	69
2018	10	14	7	54	-4.47	2.1	42.75183	141.89816	31.97	0.21	0.18	307	89	132	12	23	28	9	A	93	66
2018	10	14	8	22	11.69	1.8	42.79133	142.007	33.7	0.23	0.21	158	88	-105	25	39	20	27	C	68	66
2018	10	14	11	46	31.21	2.5	42.66367	142.015	35.65	0.22	0.22	276	30	93	32	20	28	21	C	81	67
2018	10	14	20	13	8.56	2.1	42.682	141.96967	32.59	0.21	0.19	224	4	146	30	17	26	13	A	86	67
2018	10	14	21	7	17.54	3.7	42.60883	141.95717	31.61	0.21	0.14	208	41	-163	18	15	58	15	A	95	67
2018	10	15	9	16	49.18	2.7	42.76933	142.00166	34.14	0.2	0.18	196	75	-108	24	36	33	22	C	70	68
2018	10	15	12	20	33.8	3.5	42.55083	142.0085	34.55	0.24	0.18	341	23	180	23	15	47	13	A	99	70
2018	10	16	21	38	-0.76	3.3	42.54917	141.9785	34.77	0.25	0.19	313	47	112	34	23	46	26	C	73	68
2018	10	17	9	54	34.55	3	42.5835	141.94484	31.22	0.22	0.15	236	22	127	33	18	42	15	B	79	69
2018	10	18	8	57	33.87	3	42.667	142.00133	36.66	0.22	0.22	283	19	166	29	14	43	8	A	84	65
2018	10	18	18	4	14.63	1.7	42.81683	141.9585	32.48	0.21	0.2	160	81	-97	24	36	20	11	B	72	61
2018	10	18	21	12	31.41	4.6	42.83267	141.99733	32.16	0.18	0.14	148	37	55	18	18	72	17	B	99	61
2018	10	19	21	39	32.72	2.2	42.72717	141.95	36.77	0.22	0.22	315	52	77	33	33	34	15	B	63	65
2018	10	19	22	25	32.89	3.2	42.58817	141.9395	30.8	0.21	0.14	242	68	-163	28	12	50	14	A	85	68
2018	10	19	22	52	21.95	1.4	42.76683	141.91949	6.84	0.09	0.1	216	87	131	40	38	15	18	D	50	64
2018	10	20	0	14	44.32	2.3	42.60633	142.002	29.07	0.19	0.15	219	62	178	14	13	46	18	B	100	67
2018	10	20	0	33	2.87	1.6	42.66317	141.994	32.97	0.26	0.26	32	11	-91	41	35	14	8	D	43	65
2018	10	20	5	22	-1.17	2.6	42.54716	142.00034	34.59	0.25	0.19	301	51	120	28	17	38	14	A	88	73
2018	10	20	5	45	32.15	2.1	42.66417	142.00467	37.62	0.24	0.24	322	23	-108	38	32	16	8	C	53	60
2018	10	20	7	43	10.71	4	42.71383	141.98683	33.28	0.19	0.15	124	20	58	31	18	55	16	B	86	63
2018	10	20	16	27	6.92	2.8	42.59033	141.96001	35.34	0.24	0.21	119	63	-134	8	10	38	16	B	100	71
2018	10	20	19	21	54.45	2.7	42.67317	141.9655	30.4	0.19	0.14	45	88	-143	30	25	52	21	C	70	67
2018	10	20	19	46	9.23	1.8	42.62366	141.95551	27.91	0.2	0.19	40	60	142	19	19	23	5	A	95	69
2018	10	20	21	26	6.72	1.7	42.71483	141.985	33.03	0.21	0.2	246	34	152	40	19	26	9	B	63	64
2018	10	21	2	52	46.42	2	42.65217	141.99049	37.83	0.26	0.26	355	78	85	35	38	20	14	C	56	63
2018	10	21	4	4	12.95	2	42.68017	142.0545	14.42	0.11	0.13	64	49	164	24	25	26	16	B	89	61
2018	10	21	4	7	46.57	1.3	42.67633	142.05766	14.16	0.13	0.17	15	80	-177	44	43	15	17	D	42	61
2018	10	21	5	53	41.38	2.7	42.72583	141.98801	33.77	0.2	0.16	193	52	119	16	29	37	15	A	87	65
2018	10	21	6	55	36.13	2.9	42.59017	141.98083	29.94	0.06	0.07	340	27	132	19	13	43	8	A	99	66
2018	10	21	15	45	20.47	3.2	42.71333	141.98199	34.31	0.2	0.16	21	53	93	19	23	51	21	C	95	64
2018	10	21	22	22	-3.3	1.9	42.709	141.98	33.84	0.21	0.2	147	33	40	29	21	31	16	B	73	68
2018	10	22	5	13	29.23	2.6	42.72933	141.98466	34.35	0.2	0.17	113	28	25	16	12	42	14	A	99	64
2018	10	22	8	8	36.72	2.1	42.66683	141.90016	18	0.14	0.14	245	73	-179	36	34	14	33	D	65	73
2018	10	23	6	53	21.41	2.6	42.77417	142.02417	36.45	0.21	0.21	198	16	52	33	19	33	10	B	77	70
2018	10	24	0	4	31.43	2.2	42.67783	141.97383	30.81	0.2	0.16	291	8	-154	36	22	19	12	B	67	63
2018	10	24	5	22	12.73	3.3	42.659	141.9715	29.27	0.18	0.14	56	81	127	11	10	49	12	A	100	68
2018	10	25	2	49	33.66	2.4	42.74533	141.98167	33.59	0.2	0.18	107	12	59	32	11	30	10	A	85	62
2018	10	25	18	18	21.27	4.3	42.754	141.98584	35.42	0.2	0.19	5	85	155	24	18	58	19	B	80	53
2018	10	26	18	1	6.63	3.1	42.79133	141.9845	33.97	0.19	0.16	40	28	75	41	21	47	22	C	66	63
2018	10	26	20	12	32.7	1.8	42.788	142.00734	33.48	0.23	0.23	346	87	104	31	42	19	20	C	55	56
2018	10	28	7	34	33.61	2.2	42.68033	141.9655	29.88	0.2	0.2	356	88	79	21	39	23	13	B	66	70
2018	10	29	0	44	7.4	1.4	42.6525	141.9375	10.02	0.12	0.16	276	34	111	46	43	11	31	D	33	71
2018	10	29	1	14	52.44	3.7	42.69533	141.95084	35.33	0.21	0.19	194	33	-163	31	31	53	16	B	70	60
2018	10	29	22	20	37.01	1.8	42.7125	141.991	34.4	0.23	0.22	22	67	139	39	47	14	38	D	39	66
2018	10	30	22	0	47.34	2.1	42.707	141.97484	33.7	0.23	0.19	63	71	-89	22	34	26	12	B	75	77
2018	10	31	14	6	52.37	2.1	42.8165	142.00349	32.89	0.24	0.21	358	84	105	24	41	22	12	B	69	63
